# Supplementary material for: Interactions of copper(ii) and zinc(ii) with chlorophyll: insights from density functional theory studies
Source: Royal Society of Chemistry journal article supplement (doi:10.1039/c5nj03244j), 2016-01-01
Supplement: c5nj03244j1.pdf [file c5nj03244j1.pdf]

## Supplementary Information

### Interactions of copper (II) and zinc (II) with Chlorophyll: insights from Density Functional Theory Studies.

Rim Bechaieb,<sup>a,b,c</sup> Arij B. Fredj,<sup>a</sup> Azaiez B. Akacha<sup>b</sup> and Hélène Gérard\*,<sup>c,d</sup>

**Author Email Address:** rim.bechaieb@gmail.com

erijbf@yahoo.fr

azaiezbenakacha@yahoo.fr

\* helene.gerard@upmc.fr

#### Contents:

1. Optimized geometries, Cartesian coordinates, total energies (E (u.a)) and Gibbs free energies (G(u.a)) for all the calculated structures :

#### 2. a. Substitution

##### 2. a.1 Pheo(M) complexes

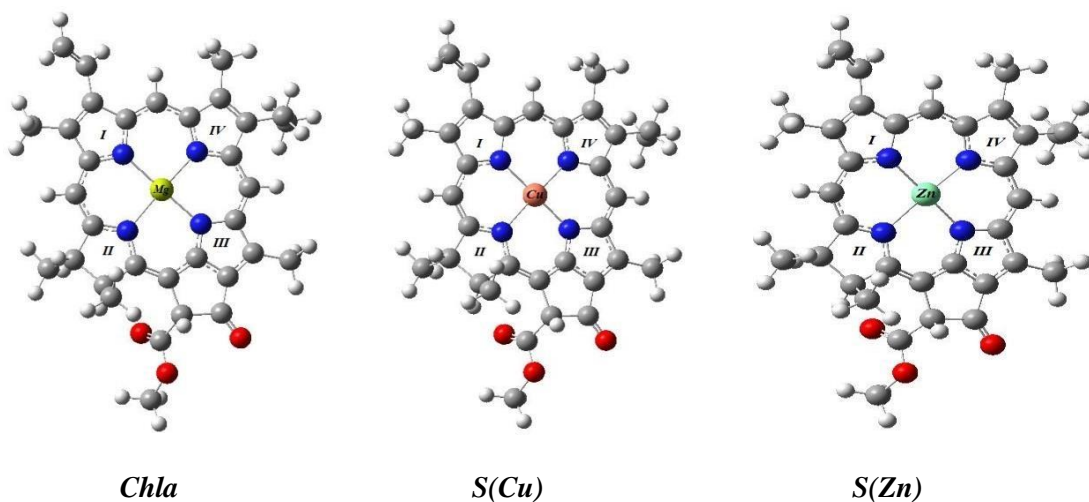

\*\* Cartesian coordinates (xyz)

#### *Chla (Pheo(Mg))*

E: -1921.725176 u.a

G: -1921.208806 u.a

C -2.696487 -0.110289 -0.403813

|    |           |           |           |
|----|-----------|-----------|-----------|
| C  | -1.953508 | 1.089872  | -0.339160 |
| C  | -2.739443 | 2.272264  | -0.383874 |
| C  | -4.146026 | 1.901077  | -0.474660 |
| C  | -4.162522 | 0.299305  | -0.523184 |
| C  | -1.862569 | 3.351156  | -0.332007 |
| C  | -0.544178 | 2.752500  | -0.256172 |
| N  | -0.648230 | 1.362303  | -0.260864 |
| Mg | 0.755861  | -0.082463 | -0.156532 |
| N  | -0.786512 | -1.576804 | -0.227375 |
| C  | -0.519282 | -2.902793 | -0.105105 |
| C  | -1.805917 | -3.719708 | -0.030434 |
| C  | -2.883900 | -2.697255 | -0.473654 |
| C  | -2.141786 | -1.373794 | -0.360665 |
| C  | 0.740099  | -3.484957 | -0.014671 |
| C  | 2.003389  | -2.858256 | 0.002958  |
| N  | 2.196535  | -1.509167 | -0.042008 |
| C  | 3.555261  | -1.280113 | 0.017628  |
| C  | 4.254625  | -2.560532 | 0.086674  |
| C  | 3.281507  | -3.542629 | 0.087360  |
| C  | 4.151618  | -0.023231 | 0.008116  |
| C  | 3.524564  | 1.240635  | -0.036870 |
| N  | 2.174348  | 1.429551  | -0.101965 |
| C  | 1.957460  | 2.790842  | -0.119426 |
| C  | 3.230096  | 3.488583  | -0.062934 |
| C  | 4.208388  | 2.519123  | -0.013622 |
| C  | 5.695533  | 2.702056  | 0.062335  |
| C  | 3.404938  | 4.981699  | -0.021571 |
| C  | 3.252113  | 5.576151  | 1.392339  |
| C  | 0.694361  | 3.399588  | -0.190720 |
| C  | 3.462272  | -5.025276 | 0.203803  |
| C  | 5.704639  | -2.696199 | 0.179693  |
| C  | 6.448808  | -3.723034 | -0.259386 |
| C  | -3.389513 | -2.952497 | -1.906191 |
| C  | -2.045337 | -4.264862 | 1.389468  |
| C  | -2.196253 | 4.810643  | -0.348723 |
| O  | -5.144726 | 2.591784  | -0.517511 |

|   |           |           |           |
|---|-----------|-----------|-----------|
| C | -5.068149 | -0.231265 | 0.575330  |
| O | -4.704318 | -0.627333 | 1.663195  |
| O | -6.357854 | -0.182283 | 0.187985  |
| C | -7.317499 | -0.555545 | 1.189524  |
| H | 5.236215  | -0.007215 | 0.043063  |
| H | 5.977975  | 3.749865  | -0.077342 |
| H | 6.216053  | 2.117275  | -0.706340 |
| H | 6.096479  | 2.384332  | 1.034205  |
| H | 2.680945  | 5.460857  | -0.693323 |
| H | 4.394112  | 5.245958  | -0.414422 |
| H | 3.997569  | 5.154861  | 2.075595  |
| H | 2.262397  | 5.356353  | 1.807251  |
| H | 3.381278  | 6.664589  | 1.374553  |
| H | 0.677809  | 4.485642  | -0.199203 |
| H | -1.732650 | 5.322019  | -1.202122 |
| H | -3.278282 | 4.949119  | -0.415403 |
| H | -1.842960 | 5.315645  | 0.559481  |
| H | 6.225253  | -1.863845 | 0.652756  |
| H | 6.023338  | -4.572860 | -0.783462 |
| H | 7.526703  | -3.725650 | -0.125605 |
| H | 4.389641  | -5.262823 | 0.734963  |
| H | 3.515944  | -5.515502 | -0.778353 |
| H | 2.633666  | -5.488914 | 0.749852  |
| H | 0.746605  | -4.568686 | 0.051004  |
| H | -2.981857 | -4.833394 | 1.428718  |
| H | -1.231167 | -4.926627 | 1.704067  |
| H | -2.116505 | -3.445429 | 2.113515  |
| H | -1.758802 | -4.566166 | -0.727254 |
| H | -3.879620 | -3.931257 | -1.968639 |
| H | -4.113578 | -2.194213 | -2.221534 |
| H | -2.558994 | -2.942637 | -2.621788 |
| H | -3.736545 | -2.710428 | 0.213961  |
| H | -8.292685 | -0.441463 | 0.715612  |
| H | -7.234944 | 0.099485  | 2.060600  |
| H | -7.160996 | -1.590536 | 1.506174  |
| H | -4.614346 | 0.033123  | -1.486384 |

*S(Cu): Pheo(Cu)*

**E: -3361.879888 u.a**

**G: -3361.365070 u.a**

|    |           |           |           |
|----|-----------|-----------|-----------|
| N  | 2.105598  | 1.385672  | -0.088681 |
| C  | 3.460626  | 1.208183  | -0.073130 |
| C  | 4.151211  | 2.478588  | -0.055617 |
| C  | 3.178388  | 3.448684  | -0.052227 |
| C  | 1.908116  | 2.753313  | -0.077318 |
| C  | 4.095221  | -0.037762 | -0.053472 |
| C  | 3.470505  | -1.267140 | -0.007180 |
| N  | 2.102463  | -1.465250 | -0.014386 |
| C  | 1.918026  | -2.817208 | 0.073610  |
| C  | 3.187741  | -3.513507 | 0.135908  |
| C  | 4.164537  | -2.545661 | 0.069844  |
| C  | 0.676164  | -3.458050 | 0.099099  |
| C  | -0.560941 | -2.859436 | -0.014934 |
| N  | -0.793609 | -1.531996 | -0.182882 |
| C  | -2.149837 | -1.347409 | -0.359472 |
| C  | -2.887676 | -2.666690 | -0.492326 |
| C  | -1.850712 | -3.663091 | 0.066133  |
| Cu | 0.716372  | -0.067187 | -0.120343 |
| N  | -0.651750 | 1.319414  | -0.201985 |
| C  | -1.961878 | 1.073690  | -0.310979 |
| C  | -2.739297 | 2.260172  | -0.353003 |
| C  | -1.859383 | 3.327476  | -0.265234 |
| C  | -0.553831 | 2.715881  | -0.178512 |
| C  | -4.146286 | 1.907412  | -0.486931 |
| C  | -4.177745 | 0.310359  | -0.562993 |
| C  | -2.719243 | -0.102413 | -0.410644 |
| O  | -5.133753 | 2.613237  | -0.543904 |
| C  | -5.115343 | -0.230002 | 0.503744  |
| O  | -6.394117 | -0.156986 | 0.086269  |
| C  | -7.382931 | -0.536409 | 1.056913  |
| C  | -2.174842 | 4.790987  | -0.266068 |
| C  | 0.664736  | 3.376365  | -0.112179 |

|   |           |           |           |
|---|-----------|-----------|-----------|
| C | -2.152730 | -4.093866 | 1.513236  |
| C | -3.270217 | -2.958792 | -1.955474 |
| C | 5.616782  | -2.689412 | 0.113497  |
| C | 6.333828  | -3.722112 | -0.354739 |
| C | 3.352379  | -4.994153 | 0.292584  |
| C | 5.641580  | 2.647300  | -0.031312 |
| C | 3.352939  | 4.941172  | 0.007069  |
| C | 3.229120  | 5.516275  | 1.431705  |
| O | -4.782478 | -0.650393 | 1.592272  |
| H | 5.179249  | -0.031646 | -0.059496 |
| H | 5.925087  | 3.698732  | -0.136102 |
| H | 6.126721  | 2.094445  | -0.845454 |
| H | 6.078065  | 2.284976  | 0.908929  |
| H | 2.617182  | 5.430370  | -0.644251 |
| H | 4.334490  | 5.209135  | -0.401750 |
| H | 3.987742  | 5.085253  | 2.094010  |
| H | 2.247942  | 5.291938  | 1.863973  |
| H | 3.359240  | 6.604682  | 1.425710  |
| H | 0.645745  | 4.461308  | -0.104608 |
| H | -1.691370 | 5.309609  | -1.103802 |
| H | -3.254061 | 4.941157  | -0.350263 |
| H | -1.833427 | 5.278588  | 0.655957  |
| H | 6.160919  | -1.864560 | 0.572744  |
| H | 5.879847  | -4.564337 | -0.867412 |
| H | 7.415512  | -3.738363 | -0.257513 |
| H | 4.318145  | -5.228381 | 0.750934  |
| H | 3.312212  | -5.520844 | -0.671036 |
| H | 2.567498  | -5.421257 | 0.926260  |
| H | 0.682038  | -4.537871 | 0.201917  |
| H | -3.088210 | -4.663936 | 1.554008  |
| H | -1.351172 | -4.722290 | 1.916181  |
| H | -2.261487 | -3.219470 | 2.164415  |
| H | -1.779119 | -4.559284 | -0.562539 |
| H | -3.765609 | -3.933891 | -2.031962 |
| H | -3.954253 | -2.201222 | -2.352004 |
| H | -2.381293 | -2.977568 | -2.596699 |

|   |           |           |           |
|---|-----------|-----------|-----------|
| H | -3.793716 | -2.656392 | 0.122102  |
| H | -8.344489 | -0.400222 | 0.561559  |
| H | -7.313218 | 0.100836  | 1.942153  |
| H | -7.247513 | -1.579241 | 1.357009  |
| H | -4.603637 | 0.059931  | -1.542176 |

**S(Zn): Pheo(Zn)**

**E: -3500.715754 u.a**

**G: -3500.201795 u.a**

|   |           |           |           |
|---|-----------|-----------|-----------|
| N | 2.156960  | 1.404242  | -0.094114 |
| C | 3.503585  | 1.204177  | -0.038476 |
| C | 4.205436  | 2.472623  | -0.019705 |
| C | 3.239396  | 3.452469  | -0.060331 |
| C | 1.960259  | 2.766799  | -0.107325 |
| C | 4.103051  | -0.066101 | 0.006841  |
| C | 3.467837  | -1.299223 | 0.028179  |
| N | 2.100475  | -1.500977 | -0.023991 |
| C | 1.893550  | -2.852185 | 0.029465  |
| C | 3.160303  | -3.553194 | 0.115357  |
| C | 4.145996  | -2.587865 | 0.103788  |
| C | 0.637915  | -3.480572 | 0.014006  |
| C | -0.613480 | -2.891905 | -0.085639 |
| N | -0.854442 | -1.565577 | -0.214528 |
| C | -2.204638 | -1.352695 | -0.354762 |
| C | -2.966632 | -2.663374 | -0.474364 |
| C | -1.907063 | -3.696721 | -0.017860 |
| C | -2.738255 | -0.083762 | -0.391577 |
| C | -4.193568 | 0.354436  | -0.520924 |
| C | -4.140997 | 1.951828  | -0.462215 |
| C | -2.727223 | 2.288709  | -0.358966 |
| C | -1.965533 | 1.091449  | -0.313582 |
| C | -1.833155 | 3.349356  | -0.301774 |
| C | -0.528506 | 2.728833  | -0.223634 |
| N | -0.651770 | 1.335006  | -0.226715 |
| C | -5.120531 | -0.166197 | 0.564665  |
| O | -6.405240 | -0.080127 | 0.167636  |

|    |           |           |           |
|----|-----------|-----------|-----------|
| C  | -7.382181 | -0.441975 | 1.156741  |
| O  | -5.121183 | 2.668570  | -0.508526 |
| C  | -2.139825 | 4.814813  | -0.317912 |
| C  | 0.704872  | 3.378536  | -0.166368 |
| Zn | 0.728198  | -0.076502 | -0.146391 |
| C  | -2.163643 | -4.232768 | 1.402297  |
| C  | -3.459611 | -2.912558 | -1.912193 |
| C  | 5.594722  | -2.746381 | 0.193651  |
| C  | 6.320211  | -3.774943 | -0.270784 |
| C  | 3.317486  | -5.037495 | 0.244809  |
| C  | 5.695442  | 2.633358  | 0.044881  |
| C  | 3.427400  | 4.943793  | -0.019010 |
| C  | 3.286168  | 5.539399  | 1.395627  |
| O  | -4.775246 | -0.584150 | 1.650187  |
| H  | 4.031182  | 5.111835  | 2.075421  |
| H  | 4.417121  | 5.199193  | -0.416339 |
| H  | 2.704497  | 5.429314  | -0.687444 |
| H  | 2.296636  | 5.328156  | 1.815351  |
| H  | 3.424525  | 6.626676  | 1.377028  |
| H  | 6.200924  | 2.045735  | -0.731673 |
| H  | 6.099624  | 2.303863  | 1.011455  |
| H  | 5.991532  | 3.677911  | -0.090846 |
| H  | 5.187455  | -0.081817 | 0.033888  |
| H  | 6.128958  | -1.934971 | 0.687352  |
| H  | 7.397858  | -3.800987 | -0.137414 |
| H  | 5.878568  | -4.603385 | -0.815626 |
| H  | 4.262882  | -5.284866 | 0.737584  |
| H  | 3.317230  | -5.541858 | -0.731542 |
| H  | 2.505864  | -5.477270 | 0.834558  |
| H  | 0.645393  | -4.563528 | 0.085642  |
| H  | -1.861857 | -4.546165 | -0.711161 |
| H  | -1.357914 | -4.899950 | 1.727274  |
| H  | -3.105190 | -4.793249 | 1.435999  |
| H  | -2.234017 | -3.409177 | 2.121575  |
| H  | -2.620980 | -2.916296 | -2.618237 |
| H  | -3.964369 | -3.883529 | -1.979203 |

|   |           |           |           |
|---|-----------|-----------|-----------|
| H | -3.826520 | -2.661904 | 0.204150  |
| H | -4.168095 | -2.143302 | -2.236533 |
| H | 0.684810  | 4.464251  | -0.175218 |
| H | -1.787606 | 5.310988  | 0.595514  |
| H | -1.659126 | 5.320252  | -1.165233 |
| H | -3.218636 | 4.971645  | -0.394943 |
| H | -4.639991 | 0.102647  | -1.490507 |
| H | -7.288353 | 0.197532  | 2.038104  |
| H | -8.350275 | -0.294452 | 0.677594  |
| H | -7.256004 | -1.485438 | 1.458761  |

2. a.2.  $[M(CH_3CN)_6]^{2+}$  complexes ( $M : Mg, Cu, Zn$ )

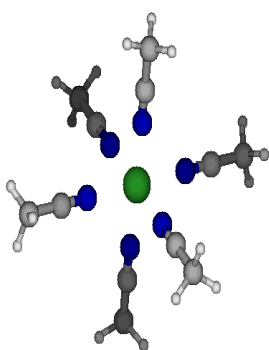

(Mg)

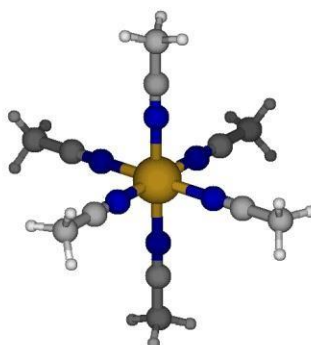

(Cu)

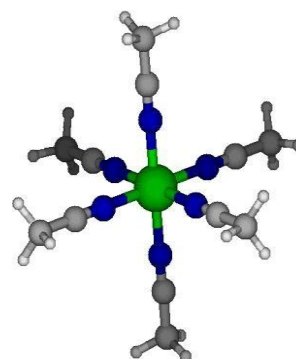

(Zn)

\*\* Cartesian coordinates (xyz)

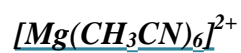

**E: -996.375773 u.a**

**G: -996.157933 u.a**

|    |          |           |          |
|----|----------|-----------|----------|
| Mg | 0.000326 | -0.005478 | 0.005675 |
| N  | 0.000801 | -0.004301 | 2.194448 |
| N  | 2.189364 | -0.007855 | 0.006579 |



|   |           |           |           |
|---|-----------|-----------|-----------|
| N | -0.000518 | -0.004509 | -2.183042 |
| N | -2.188792 | -0.005243 | 0.007076  |
| N | -0.000352 | 2.183403  | 0.003875  |
| N | 0.001100  | -2.194544 | 0.004357  |
| C | 0.005442  | -3.351061 | 0.003970  |
| C | 0.000507  | -0.004914 | -3.339567 |
| C | -0.001703 | 3.339926  | 0.004081  |
| C | -3.345284 | -0.013413 | 0.010690  |
| C | 0.002232  | -0.004433 | 3.350974  |
| C | 3.345871  | -0.001438 | 0.008384  |
| C | 0.008429  | -4.807659 | 0.000777  |
| H | -0.028152 | -5.183644 | 1.028036  |
| H | -0.862720 | -5.181337 | -0.546456 |
| H | 0.918140  | -5.178306 | -0.481918 |
| C | -0.001473 | -0.003094 | -4.796152 |
| H | -0.003335 | -1.031431 | -5.170988 |
| H | -0.892609 | 0.512796  | -5.167282 |
| H | 0.889375  | 0.510934  | -5.170459 |
| C | 4.802447  | 0.003709  | 0.007103  |
| H | 5.172354  | 1.033837  | 0.006646  |
| H | 5.178904  | -0.509484 | 0.897517  |
| H | 5.176397  | -0.509273 | -0.884539 |
| C | 0.000599  | -0.002411 | 4.807573  |
| H | 0.003519  | -1.030705 | 5.182516  |
| H | 0.889160  | 0.515686  | 5.181677  |
| H | -0.892890 | 0.509314  | 5.178821  |
| C | -4.801852 | -0.020907 | 0.012448  |
| H | -5.170060 | -1.051625 | 0.018705  |
| H | -5.177157 | 0.496743  | 0.900764  |
| H | -5.178674 | 0.486324  | -0.881263 |
| C | -0.007118 | 4.796508  | 0.002151  |
| H | -0.031580 | 5.171246  | 1.030244  |
| H | 0.893428  | 5.173080  | -0.492952 |
| H | -0.888124 | 5.165461  | -0.532368 |

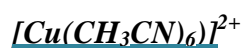

**E: -2436.452967 u.a**

**G: -2436.243846 u.a**

|    |           |           |           |
|----|-----------|-----------|-----------|
| Cu | -0.000227 | -0.004197 | 0.004245  |
| N  | -0.000378 | -0.004692 | 1.967546  |
| N  | 2.194981  | -0.010863 | 0.004569  |
| N  | -0.000620 | -0.001533 | -1.960634 |
| N  | -2.195666 | 0.000155  | 0.004801  |
| N  | -0.001218 | 2.191237  | 0.004078  |
| N  | 0.000612  | -2.199816 | 0.000578  |
| C  | 0.003989  | -3.357036 | 0.003041  |
| C  | 0.001019  | -0.006765 | -3.114716 |
| C  | -0.004493 | 3.348447  | 0.007863  |
| C  | -3.352845 | -0.009704 | 0.007338  |
| C  | 0.001091  | -0.005413 | 3.121651  |
| C  | 3.352172  | -0.002531 | 0.007115  |
| C  | 0.007431  | -4.814705 | 0.002445  |
| H  | -0.001292 | -5.189843 | 1.030654  |
| H  | -0.877755 | -5.190734 | -0.520191 |
| H  | 0.904048  | -5.186579 | -0.503365 |
| C  | 0.001024  | -0.009039 | -4.569942 |
| H  | -0.000511 | -1.039033 | -4.940876 |
| H  | -0.889913 | 0.506662  | -4.942545 |
| H  | 0.893326  | 0.504053  | -4.942831 |
| C  | 4.809823  | 0.004119  | 0.008653  |
| H  | 5.179791  | 1.034216  | 0.011353  |
| H  | 5.185481  | -0.510855 | 0.898457  |
| H  | 5.187137  | -0.506921 | -0.882749 |
| C  | 0.000691  | -0.002685 | 4.576887  |
| H  | -0.001321 | -1.031376 | 4.951432  |
| H  | 0.893089  | 0.511312  | 4.948294  |
| H  | -0.890203 | 0.514555  | 4.947447  |
| C  | -4.810488 | -0.018506 | 0.008690  |
| H  | -5.178870 | -1.049157 | 0.014074  |
| H  | -5.187101 | 0.498209  | 0.897075  |
| H  | -5.188465 | 0.489563  | -0.884125 |
| C  | -0.007908 | 4.806103  | 0.008767  |

|   |           |          |           |
|---|-----------|----------|-----------|
| H | 0.003273  | 5.180197 | 1.037333  |
| H | 0.875991  | 5.182612 | -0.515696 |
| H | -0.905693 | 5.178448 | -0.494616 |

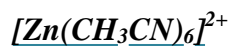

**E: -2575.326492 u.a**

**G: -2575.120253 u.a**

|    |           |           |           |
|----|-----------|-----------|-----------|
| Zn | -0.001031 | -0.005010 | 0.004819  |
| N  | -0.000479 | -0.005694 | 2.153301  |
| N  | 2.150857  | -0.010254 | 0.004992  |
| N  | -0.002435 | 0.001695  | -2.143316 |
| N  | -2.152921 | -0.001695 | 0.005164  |
| N  | 0.000731  | 2.144749  | 0.006092  |
| N  | -0.002763 | -2.154824 | 0.000383  |
| C  | 0.001364  | -3.311400 | -0.003180 |
| C  | 0.000182  | -0.001071 | -3.299920 |
| C  | -0.002664 | 3.301339  | 0.006469  |
| C  | -3.309522 | -0.006547 | 0.006572  |
| C  | 0.000771  | -0.005056 | 3.309899  |
| C  | 3.307456  | -0.006243 | 0.009163  |
| C  | 0.007140  | -4.768199 | -0.006196 |
| H  | 0.088898  | -5.143825 | 1.018854  |
| H  | -0.920362 | -5.144205 | -0.449859 |
| H  | 0.856107  | -5.137332 | -0.590512 |
| C  | 0.002932  | -0.005174 | -4.756728 |
| H  | 0.072948  | -1.032655 | -5.127980 |
| H  | -0.920262 | 0.447481  | -5.132673 |
| H  | 0.856880  | 0.568957  | -5.130370 |
| C  | 4.764281  | -0.001273 | 0.015588  |
| H  | 5.135909  | 1.024899  | -0.069993 |
| H  | 5.134847  | -0.439708 | 0.947745  |
| H  | 5.142710  | -0.588772 | -0.827107 |
| C  | 0.001966  | -0.005568 | 4.766705  |
| H  | 0.025358  | -1.034280 | 5.140458  |
| H  | 0.881187  | 0.529563  | 5.139641  |

|   |           |           |           |
|---|-----------|-----------|-----------|
| H | -0.900015 | 0.489376  | 5.140861  |
| C | -4.766355 | -0.013325 | 0.007026  |
| H | -5.136288 | -1.042896 | 0.046877  |
| H | -5.141843 | 0.535234  | 0.876815  |
| H | -5.141571 | 0.466264  | -0.902757 |
| C | -0.007685 | 4.758143  | 0.008668  |
| H | -0.017148 | 5.130299  | 1.038166  |
| H | 0.886273  | 5.135509  | -0.498211 |
| H | -0.895454 | 5.129397  | -0.513358 |

### 2. a.3. Pheo(M(CH<sub>3</sub>CN)) complexes

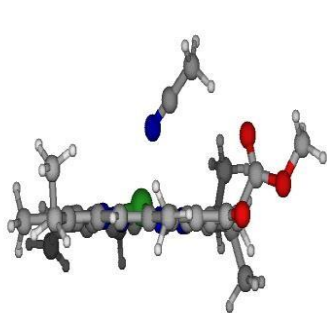

*Pheo(Mg(CH<sub>3</sub>CN))*

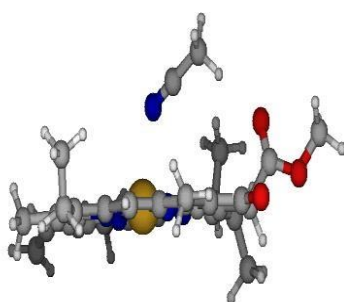

*Pheo(Cu(CH<sub>3</sub>CN))*

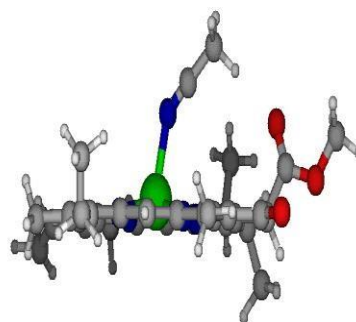

*Pheo(Zn(CH<sub>3</sub>CN))*

### *Pheo(Mg(CH<sub>3</sub>CN))*

**E: -2054.503505 u.a**

**G: -2053.946737 u.a**

|   |          |          |           |
|---|----------|----------|-----------|
| C | 4.284173 | 2.511716 | -0.091587 |
| C | 3.587668 | 1.236207 | -0.065367 |
| N | 2.243766 | 1.430084 | -0.158111 |
| C | 2.038130 | 2.787263 | -0.264838 |
| C | 3.316138 | 3.482384 | -0.213632 |

|    |           |           |           |
|----|-----------|-----------|-----------|
| C  | 4.209631  | -0.029619 | 0.009982  |
| C  | 3.612135  | -1.286393 | -0.026323 |
| N  | 2.259094  | -1.514576 | -0.124274 |
| C  | 2.070744  | -2.862056 | -0.162278 |
| C  | 3.350389  | -3.549871 | -0.081693 |
| C  | 4.318518  | -2.567763 | -0.004033 |
| C  | 0.814157  | -3.496365 | -0.263345 |
| C  | -0.444634 | -2.918757 | -0.399302 |
| N  | -0.712550 | -1.593776 | -0.472584 |
| C  | -2.054606 | -1.383732 | -0.662324 |
| C  | -2.797339 | -2.701344 | -0.850817 |
| C  | -1.727593 | -3.748074 | -0.440514 |
| Mg | 0.793005  | -0.079638 | 0.004750  |
| N  | -0.555569 | 1.360048  | -0.543804 |
| C  | -1.854786 | 1.087459  | -0.655502 |
| C  | -2.640870 | 2.269509  | -0.753622 |
| C  | -1.760882 | 3.348970  | -0.703179 |
| C  | -0.450460 | 2.747470  | -0.561188 |
| C  | -4.042722 | 1.900622  | -0.847238 |
| C  | -4.065172 | 0.294741  | -0.826336 |
| C  | -2.600734 | -0.115075 | -0.704461 |
| O  | -5.048322 | 2.582483  | -0.914367 |
| C  | -4.941888 | -0.146751 | 0.329298  |
| O  | -6.218800 | -0.296472 | -0.063547 |
| C  | -7.164158 | -0.588624 | 0.978341  |
| C  | -2.089206 | 4.808277  | -0.779073 |
| C  | 0.785928  | 3.396231  | -0.434434 |
| C  | -2.019779 | -4.411753 | 0.916590  |
| C  | -3.281519 | -2.890765 | -2.300532 |
| C  | 5.766495  | -2.701987 | 0.113435  |
| C  | 6.528015  | -3.705761 | -0.349628 |
| C  | 3.534457  | -5.036340 | -0.049222 |
| C  | 3.500257  | 4.974306  | -0.258317 |
| C  | 3.299123  | 5.655490  | 1.109591  |
| C  | 5.771920  | 2.685032  | -0.005848 |
| O  | -4.577297 | -0.313893 | 1.479969  |

|   |           |           |           |
|---|-----------|-----------|-----------|
| H | 5.293378  | -0.015909 | 0.068405  |
| H | 6.063505  | 3.729509  | -0.152387 |
| H | 6.294178  | 2.089357  | -0.765317 |
| H | 6.163521  | 2.372195  | 0.971453  |
| H | 2.804683  | 5.414519  | -0.984619 |
| H | 4.505048  | 5.210170  | -0.629087 |
| H | 4.016582  | 5.273870  | 1.844365  |
| H | 2.293585  | 5.464546  | 1.500255  |
| H | 3.434926  | 6.740626  | 1.030733  |
| H | 0.774587  | 4.481301  | -0.486775 |
| H | -1.651169 | 5.274896  | -1.671260 |
| H | -3.172236 | 4.950192  | -0.821805 |
| H | -1.705308 | 5.357265  | 0.090231  |
| H | 6.272082  | -1.887364 | 0.631833  |
| H | 6.121400  | -4.535974 | -0.918217 |
| H | 7.602558  | -3.707226 | -0.190416 |
| H | 4.444793  | -5.302913 | 0.497764  |
| H | 3.623988  | -5.466654 | -1.056666 |
| H | 2.690492  | -5.535398 | 0.439325  |
| H | 0.829102  | -4.582222 | -0.252257 |
| H | -2.956054 | -4.981228 | 0.874700  |
| H | -1.216577 | -5.097967 | 1.205556  |
| H | -2.116876 | -3.657078 | 1.705876  |
| H | -1.646400 | -4.535882 | -1.200459 |
| H | -3.764985 | -3.867999 | -2.417831 |
| H | -4.004238 | -2.121918 | -2.591455 |
| H | -2.439179 | -2.841771 | -3.000057 |
| H | -3.665024 | -2.751325 | -0.180601 |
| H | -8.131859 | -0.659282 | 0.481511  |
| H | -7.171875 | 0.213205  | 1.721000  |
| H | -6.914129 | -1.531961 | 1.471540  |
| H | -4.547213 | -0.022298 | -1.757540 |
| N | 0.043872  | -0.085605 | 2.133839  |
| C | -0.882804 | -0.028857 | 2.825582  |
| C | -2.081460 | 0.042824  | 3.649425  |
| H | -2.959920 | -0.047326 | 2.997507  |

|   |           |           |          |
|---|-----------|-----------|----------|
| H | -2.115800 | 1.001009  | 4.177005 |
| H | -2.084175 | -0.769143 | 4.383127 |

**Pheo(Cu(CH<sub>3</sub>CN))**

**E: -3494.644025 u.a**

**G: -3494.090112 u.a**

|    |           |           |           |
|----|-----------|-----------|-----------|
| N  | -0.556710 | 1.324140  | -0.476949 |
| C  | -1.863148 | 1.077325  | -0.597309 |
| C  | -2.638953 | 2.264437  | -0.677336 |
| C  | -1.754982 | 3.332516  | -0.598431 |
| C  | -0.455507 | 2.718702  | -0.471321 |
| C  | -2.621928 | -0.101953 | -0.685204 |
| C  | -4.077218 | 0.312310  | -0.859416 |
| C  | -4.042048 | 1.913071  | -0.815824 |
| C  | -2.060446 | -1.351624 | -0.632155 |
| N  | -0.711040 | -1.544211 | -0.438795 |
| C  | -0.478075 | -2.871469 | -0.299649 |
| C  | -1.766703 | -3.683379 | -0.271549 |
| C  | -2.804147 | -2.666454 | -0.794288 |
| C  | 0.759170  | -3.468424 | -0.162426 |
| C  | 1.999779  | -2.824709 | -0.123676 |
| N  | 2.188500  | -1.474073 | -0.180761 |
| C  | 3.551031  | -1.274473 | -0.103049 |
| C  | 4.244827  | -2.555289 | -0.020072 |
| C  | 3.267969  | -3.524014 | -0.020821 |
| C  | 4.177441  | -0.044299 | -0.109485 |
| C  | 3.546721  | 1.204135  | -0.162601 |
| N  | 2.197418  | 1.386045  | -0.238375 |
| C  | 2.002840  | 2.752847  | -0.264605 |
| C  | 3.275249  | 3.446426  | -0.202037 |
| C  | 4.242706  | 2.474132  | -0.142768 |
| Cu | 0.797503  | -0.067142 | -0.207330 |
| C  | 5.731679  | 2.637826  | -0.063989 |
| C  | 3.453091  | 4.939312  | -0.171725 |
| C  | 3.274307  | 5.548387  | 1.232787  |

|   |           |           |           |
|---|-----------|-----------|-----------|
| C | 0.764976  | 3.377344  | -0.369090 |
| C | 3.427298  | -5.007743 | 0.109301  |
| C | 5.693600  | -2.698240 | 0.086668  |
| C | 6.435019  | -3.719655 | -0.368618 |
| C | -3.202482 | -2.921919 | -2.259911 |
| C | -2.078375 | -4.188955 | 1.148405  |
| C | -5.024932 | -0.178253 | 0.217219  |
| O | -4.731166 | -0.407697 | 1.376254  |
| O | -5.035658 | 2.611406  | -0.886309 |
| C | -2.066011 | 4.796678  | -0.643272 |
| O | -6.275517 | -0.294958 | -0.262107 |
| C | -7.285594 | -0.632630 | 0.703034  |
| H | 4.004282  | 5.130677  | 1.934653  |
| H | 4.451274  | 5.195185  | -0.546743 |
| H | 2.745704  | 5.414905  | -0.863389 |
| H | 2.275920  | 5.335955  | 1.630283  |
| H | 3.408125  | 6.636197  | 1.206918  |
| H | 6.244833  | 2.076117  | -0.854735 |
| H | 6.131098  | 2.281264  | 0.894783  |
| H | 6.023610  | 3.687301  | -0.166629 |
| H | 5.260644  | -0.039302 | -0.064846 |
| H | 6.213653  | -1.882011 | 0.587536  |
| H | 7.511041  | -3.735860 | -0.220936 |
| H | 6.008107  | -4.551906 | -0.919490 |
| H | 4.373241  | -5.252206 | 0.602486  |
| H | 3.428110  | -5.513207 | -0.866581 |
| H | 2.616783  | -5.448817 | 0.699804  |
| H | 0.766008  | -4.550579 | -0.085671 |
| H | -1.686774 | -4.547624 | -0.942718 |
| H | -1.287025 | -4.850239 | 1.517084  |
| H | -3.022930 | -4.745846 | 1.159422  |
| H | -2.168560 | -3.349980 | 1.847514  |
| H | -2.319497 | -2.919491 | -2.909282 |
| H | -3.694050 | -3.897239 | -2.357047 |
| H | -3.707821 | -2.672908 | -0.173391 |
| H | -3.893792 | -2.157931 | -2.630289 |



|   |           |           |           |
|---|-----------|-----------|-----------|
| H | 0.749366  | 4.462429  | -0.382616 |
| H | -1.707678 | 5.316000  | 0.254709  |
| H | -1.595035 | 5.284612  | -1.506434 |
| H | -3.145914 | 4.948734  | -0.716576 |
| H | -4.500232 | 0.038001  | -1.832499 |
| H | -7.335814 | 0.130231  | 1.484043  |
| H | -8.220568 | -0.670359 | 0.143902  |
| H | -7.070616 | -1.601633 | 1.161590  |
| N | 0.022388  | -0.208298 | 2.386179  |
| C | -0.987914 | -0.010184 | 2.921310  |
| C | -2.275032 | 0.235426  | 3.564907  |
| H | -2.396412 | -0.423725 | 4.430530  |
| H | -2.330869 | 1.274282  | 3.905457  |
| H | -3.086212 | 0.047593  | 2.851904  |

**Pheo(Zn(CH<sub>3</sub>CN))**

**E: -3633.489019 u.a**

**G: -3632.933766 u.a**

|   |           |           |           |
|---|-----------|-----------|-----------|
| N | -0.561742 | 1.335592  | -0.514122 |
| C | -1.868928 | 1.091199  | -0.631294 |
| C | -2.630073 | 2.288223  | -0.737633 |
| C | -1.732862 | 3.349597  | -0.684421 |
| C | -0.436764 | 2.726346  | -0.534227 |
| C | -2.645699 | -0.086852 | -0.691168 |
| C | -4.098474 | 0.351960  | -0.832003 |
| C | -4.039031 | 1.953832  | -0.845855 |
| C | -2.122016 | -1.361532 | -0.648067 |
| N | -0.783875 | -1.581635 | -0.461973 |
| C | -0.541356 | -2.907124 | -0.382705 |
| C | -1.831348 | -3.724295 | -0.415782 |
| C | -2.886663 | -2.666957 | -0.830727 |
| C | 0.711068  | -3.491995 | -0.253207 |
| C | 1.962086  | -2.857101 | -0.165350 |
| N | 2.167249  | -1.507901 | -0.144013 |

|    |           |           |           |
|----|-----------|-----------|-----------|
| C  | 3.528331  | -1.307729 | -0.047668 |
| C  | 4.212467  | -2.598478 | -0.023041 |
| C  | 3.230027  | -3.563425 | -0.088157 |
| C  | 4.165153  | -0.073925 | -0.014542 |
| C  | 3.570938  | 1.199609  | -0.077550 |
| N  | 2.230368  | 1.406516  | -0.160873 |
| C  | 2.041773  | 2.765226  | -0.254720 |
| C  | 3.326043  | 3.447048  | -0.210959 |
| C  | 4.283322  | 2.465210  | -0.102756 |
| Zn | 0.782751  | -0.059341 | 0.037314  |
| C  | 5.773782  | 2.617590  | -0.029180 |
| C  | 3.523370  | 4.937196  | -0.250634 |
| C  | 3.335698  | 5.615018  | 1.120832  |
| C  | 0.795682  | 3.377065  | -0.415326 |
| C  | 3.389396  | -5.052500 | -0.044338 |
| C  | 5.659212  | -2.757538 | 0.087624  |
| C  | 6.400254  | -3.763071 | -0.402967 |
| C  | -3.374016 | -2.856294 | -2.279218 |
| C  | -2.127434 | -4.375693 | 0.946261  |
| C  | -5.004778 | -0.081065 | 0.303358  |
| O  | -4.662352 | -0.277635 | 1.456115  |
| O  | -5.025571 | 2.662226  | -0.921482 |
| C  | -2.033768 | 4.814458  | -0.766515 |
| O  | -6.279061 | -0.187063 | -0.110866 |
| C  | -7.248309 | -0.469524 | 0.911744  |
| H  | 4.052957  | 5.223638  | 1.850611  |
| H  | 4.528291  | 5.165154  | -0.625968 |
| H  | 2.827739  | 5.386332  | -0.971470 |
| H  | 2.330262  | 5.432768  | 1.515870  |
| H  | 3.481886  | 6.698998  | 1.045110  |
| H  | 6.281148  | 2.014641  | -0.792934 |
| H  | 6.168903  | 2.299283  | 0.944931  |
| H  | 6.078389  | 3.657983  | -0.178229 |
| H  | 5.248670  | -0.091923 | 0.038203  |
| H  | 6.180378  | -1.965391 | 0.624952  |
| H  | 7.475019  | -3.789450 | -0.247423 |

|   |           |           |           |
|---|-----------|-----------|-----------|
| H | 5.975422  | -4.570374 | -0.991157 |
| H | 4.318542  | -5.327102 | 0.465108  |
| H | 3.425849  | -5.496866 | -1.048902 |
| H | 2.560151  | -5.530559 | 0.488541  |
| H | 0.725719  | -4.577320 | -0.233173 |
| H | -1.759381 | -4.517597 | -1.170909 |
| H | -1.330705 | -5.068347 | 1.238034  |
| H | -3.069598 | -4.935717 | 0.910425  |
| H | -2.214634 | -3.614890 | 1.730714  |
| H | -2.531274 | -2.823778 | -2.979155 |
| H | -3.872495 | -3.826571 | -2.391226 |
| H | -3.754185 | -2.699215 | -0.159317 |
| H | -4.085182 | -2.078230 | -2.574234 |
| H | 0.781153  | 4.461842  | -0.466718 |
| H | -1.658326 | 5.356789  | 0.110650  |
| H | -1.570637 | 5.273451  | -1.649755 |
| H | -3.113281 | 4.974018  | -0.829937 |
| H | -4.568873 | 0.049897  | -1.774203 |
| H | -7.244761 | 0.319668  | 1.667818  |
| H | -8.209767 | -0.504276 | 0.399269  |
| H | -7.032477 | -1.427677 | 1.392310  |
| N | 0.046092  | -0.118454 | 2.154806  |
| C | -0.906763 | -0.054121 | 2.810676  |
| C | -2.133596 | 0.025236  | 3.592056  |
| H | -2.168230 | -0.789177 | 4.322416  |
| H | -2.176648 | 0.981019  | 4.123509  |
| H | -2.993671 | -0.053447 | 2.914675  |

## **2.b. Chelation**

### **2.b.1. Case of zinc (Zn)**

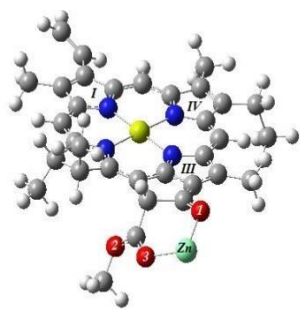

$C(\text{Zn})$

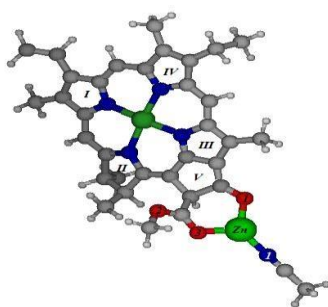

$C(\text{Zn}(\text{CH}_3\text{CN}))$

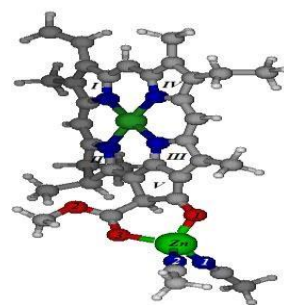

$C(\text{Zn}(\text{CH}_3\text{CN})_2)$

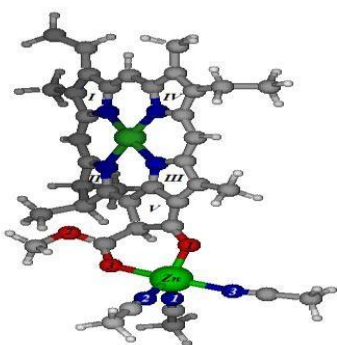

$C(\text{Zn}(\text{CH}_3\text{CN})_3)$

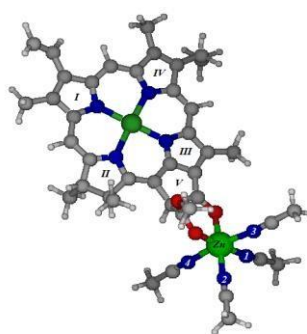

$C(\text{Zn}(\text{CH}_3\text{CN})_4)$

### $C(\text{Zn})$

**E: -3700.324977 u.a**

**G: -3699.809073 u.a**

|    |           |           |           |
|----|-----------|-----------|-----------|
| C  | -2.059502 | -0.635265 | -0.335952 |
| C  | -1.513893 | 0.660494  | -0.258463 |
| C  | -2.485927 | 1.724925  | -0.388000 |
| C  | -3.726550 | 1.138711  | -0.596027 |
| C  | -3.563397 | -0.428052 | -0.501435 |
| C  | -1.761240 | 2.944963  | -0.370260 |
| C  | -0.401093 | 2.543706  | -0.226353 |
| N  | -0.284251 | 1.142560  | -0.167514 |
| Mg | 1.345642  | -0.064480 | -0.095010 |

|   |           |           |           |
|---|-----------|-----------|-----------|
| N | 0.057370  | -1.774802 | -0.225712 |
| C | 0.550690  | -3.054746 | -0.216670 |
| C | -0.573193 | -4.076840 | -0.258300 |
| C | -1.803072 | -3.213210 | -0.638026 |
| C | -1.301217 | -1.804675 | -0.373212 |
| C | 1.886379  | -3.423513 | -0.143721 |
| C | 3.027123  | -2.596874 | -0.059726 |
| N | 2.986948  | -1.236272 | -0.028031 |
| C | 4.289350  | -0.793219 | 0.055470  |
| C | 5.202465  | -1.957512 | 0.077498  |
| C | 4.406528  | -3.077061 | 0.011158  |
| C | 4.676478  | 0.535399  | 0.083352  |
| C | 3.841235  | 1.683731  | 0.042899  |
| C | 4.331536  | 3.067226  | 0.058259  |
| C | 3.226048  | 3.870697  | -0.010104 |
| C | 2.063959  | 2.973247  | -0.062567 |
| N | 2.490939  | 1.650033  | -0.023912 |
| C | 5.774645  | 3.457690  | 0.133768  |
| C | 0.742468  | 3.380279  | -0.159772 |
| C | 3.161142  | 5.370806  | 0.001802  |
| C | 2.903385  | 5.959907  | 1.404641  |
| C | 4.815796  | -4.515734 | 0.049122  |
| C | 6.649954  | -1.845349 | 0.183616  |
| C | 7.546345  | -2.712127 | -0.316783 |
| C | -2.222435 | -3.404941 | -2.112288 |
| C | -0.731642 | -4.806478 | 1.091016  |
| C | -2.304591 | 4.333858  | -0.462779 |
| C | -4.470327 | -0.964616 | 0.601567  |
| O | -5.703266 | -0.707356 | 0.647174  |
| O | -3.911498 | -1.719624 | 1.491975  |
| C | -4.732607 | -2.269435 | 2.580886  |
| H | 5.741759  | 0.730528  | 0.127881  |
| H | 5.897673  | 4.541810  | 0.084724  |
| H | 6.352881  | 3.021683  | -0.690076 |
| H | 6.233441  | 3.117483  | 1.070707  |
| H | 2.380642  | 5.713544  | -0.689016 |

|    |           |           |           |
|----|-----------|-----------|-----------|
| H  | 4.100505  | 5.774066  | -0.390379 |
| H  | 3.701773  | 5.682823  | 2.100258  |
| H  | 1.956133  | 5.603276  | 1.824274  |
| H  | 2.862239  | 7.052176  | 1.353090  |
| H  | 0.563510  | 4.449195  | -0.199275 |
| H  | -1.585001 | 5.024348  | -0.911357 |
| H  | -3.217160 | 4.354714  | -1.066207 |
| H  | -2.561697 | 4.727554  | 0.529980  |
| H  | 7.025227  | -0.968467 | 0.708384  |
| H  | 7.260548  | -3.583207 | -0.897091 |
| H  | 8.610668  | -2.548076 | -0.181160 |
| H  | 5.769828  | -4.630735 | 0.572108  |
| H  | 4.943359  | -4.931616 | -0.958960 |
| H  | 4.075067  | -5.133904 | 0.566080  |
| H  | 2.075103  | -4.491498 | -0.158840 |
| H  | -1.559770 | -5.520917 | 1.038143  |
| H  | 0.174084  | -5.362743 | 1.349382  |
| H  | -0.934536 | -4.098103 | 1.902626  |
| H  | -0.367933 | -4.823665 | -1.033873 |
| H  | -2.524274 | -4.443462 | -2.280421 |
| H  | -3.066712 | -2.765079 | -2.390359 |
| H  | -1.393109 | -3.178405 | -2.790735 |
| H  | -2.657393 | -3.444836 | 0.006950  |
| H  | -4.043080 | -2.882809 | 3.155577  |
| H  | -5.542007 | -2.864322 | 2.157174  |
| H  | -5.126756 | -1.448976 | 3.180988  |
| H  | -3.955339 | -0.856687 | -1.437570 |
| O  | -4.845075 | 1.698896  | -0.919340 |
| Zn | -6.369492 | 0.930539  | -0.148763 |

**C(Zn(CH<sub>3</sub>CN))**

**E: -3833.183501 u.a**

**G: -3832.628349 u.a**

|   |          |           |           |
|---|----------|-----------|-----------|
| C | 1.422283 | -0.816947 | -0.015987 |
| C | 0.935986 | 0.517131  | 0.020693  |
| C | 1.958465 | 1.527908  | -0.117079 |

|    |           |           |           |
|----|-----------|-----------|-----------|
| C  | 3.167963  | 0.889618  | -0.261231 |
| C  | 2.936755  | -0.667829 | -0.111713 |
| C  | 1.280599  | 2.793796  | -0.117604 |
| C  | -0.078604 | 2.462520  | 0.024219  |
| N  | -0.263976 | 1.058121  | 0.091259  |
| Mg | -1.958250 | -0.065878 | 0.051878  |
| N  | -0.753926 | -1.824618 | -0.165690 |
| C  | -1.311843 | -3.030492 | -0.479136 |
| C  | -0.243501 | -4.038419 | -0.872000 |
| C  | 1.045116  | -3.391522 | -0.303087 |
| C  | 0.617876  | -1.936045 | -0.143455 |
| C  | -2.665835 | -3.340276 | -0.499055 |
| C  | -3.764603 | -2.485352 | -0.276003 |
| N  | -3.659708 | -1.147919 | -0.063515 |
| C  | -4.943416 | -0.648906 | 0.049109  |
| C  | -5.907777 | -1.758710 | -0.063883 |
| C  | -5.168385 | -2.897314 | -0.283377 |
| C  | -5.260023 | 0.684881  | 0.214522  |
| C  | -4.366658 | 1.794225  | 0.246992  |
| C  | -4.787835 | 3.192078  | 0.332717  |
| C  | -3.644572 | 3.945851  | 0.288743  |
| C  | -2.527939 | 3.002223  | 0.186584  |
| N  | -3.022762 | 1.697925  | 0.171319  |
| C  | -6.210571 | 3.651068  | 0.431871  |
| C  | -1.193940 | 3.346272  | 0.105931  |
| C  | -3.518115 | 5.442768  | 0.295010  |
| C  | -3.448964 | 6.053433  | -1.119902 |
| C  | -5.654012 | -4.290393 | -0.533531 |
| C  | -7.354592 | -1.588607 | 0.006840  |
| C  | -8.231287 | -2.490359 | 0.474431  |
| C  | 1.453678  | -4.055241 | 1.027513  |
| C  | -0.204321 | -4.236357 | -2.400473 |
| C  | 1.903821  | 4.146114  | -0.246691 |
| O  | 4.351231  | 1.387092  | -0.484863 |
| Zn | 5.832512  | 0.348947  | -0.134941 |
| O  | 5.059872  | -1.004357 | 1.004115  |

|   |           |           |           |
|---|-----------|-----------|-----------|
| C | 3.798509  | -1.079365 | 1.067416  |
| O | 3.199992  | -1.458311 | 2.148978  |
| C | 3.996589  | -1.784205 | 3.334619  |
| H | -6.313033 | 0.928301  | 0.299992  |
| H | -6.272798 | 4.734002  | 0.563578  |
| H | -6.726454 | 3.185617  | 1.280487  |
| H | -6.778633 | 3.399088  | -0.472631 |
| H | -2.628759 | 5.738535  | 0.865353  |
| H | -4.370196 | 5.875043  | 0.830492  |
| H | -4.354292 | 5.824114  | -1.691021 |
| H | -2.593144 | 5.664992  | -1.682970 |
| H | -3.351972 | 7.142106  | -1.060101 |
| H | -0.966847 | 4.406910  | 0.104841  |
| H | 1.162493  | 4.946719  | -0.194729 |
| H | 2.640230  | 4.320451  | 0.547481  |
| H | 2.434464  | 4.245455  | -1.201791 |
| H | -7.741353 | -0.633292 | -0.344408 |
| H | -7.924984 | -3.445824 | 0.888107  |
| H | -9.295683 | -2.277579 | 0.482054  |
| H | -6.674185 | -4.278471 | -0.927985 |
| H | -5.665192 | -4.891422 | 0.385330  |
| H | -5.020781 | -4.814793 | -1.256758 |
| H | -2.903638 | -4.373864 | -0.727194 |
| H | 0.588240  | -4.941899 | -2.671933 |
| H | -1.153203 | -4.636763 | -2.769584 |
| H | -0.014793 | -3.288905 | -2.918260 |
| H | -0.436622 | -5.007703 | -0.399283 |
| H | 1.652477  | -5.119053 | 0.861979  |
| H | 2.352565  | -3.607689 | 1.455687  |
| H | 0.650885  | -3.972177 | 1.768302  |
| H | 1.875379  | -3.476994 | -1.015313 |
| H | 3.265592  | -2.107161 | 4.071948  |
| H | 4.524883  | -0.890425 | 3.668852  |
| H | 4.698701  | -2.582497 | 3.092729  |
| H | 3.365077  | -1.169568 | -0.994510 |
| N | 7.676001  | 0.431975  | -0.589583 |



|   |           |           |           |
|---|-----------|-----------|-----------|
| C | 8.795143  | 0.526675  | -0.866889 |
| C | 10.195602 | 0.643442  | -1.219457 |
| H | 10.633699 | -0.355745 | -1.322692 |
| H | 10.726864 | 1.193521  | -0.434272 |
| H | 10.290956 | 1.183357  | -2.168423 |

**C(Zn(CH<sub>3</sub>CN)<sub>2</sub>)**

**E: -3966.006222 u.a**

**G: -3965.411644 u.a**

|    |           |           |           |
|----|-----------|-----------|-----------|
| C  | -0.996129 | -0.871429 | -0.067936 |
| C  | -0.540168 | 0.473921  | 0.004424  |
| C  | -1.579264 | 1.444629  | 0.209317  |
| C  | -2.789649 | 0.776252  | 0.288079  |
| C  | -2.514955 | -0.764605 | 0.027410  |
| C  | -0.932630 | 2.718764  | 0.303458  |
| C  | 0.438622  | 2.430424  | 0.144050  |
| N  | 0.651907  | 1.042976  | -0.022958 |
| Mg | 2.368320  | -0.042619 | -0.074008 |
| N  | 1.203751  | -1.839507 | 0.006526  |
| C  | 1.785163  | -3.051315 | 0.229072  |
| C  | 0.736603  | -4.108125 | 0.541540  |
| C  | -0.559550 | -3.451549 | 0.002348  |
| C  | -0.168589 | -1.976977 | -0.030406 |
| C  | 3.146419  | -3.334554 | 0.230333  |
| C  | 4.225958  | -2.443067 | 0.073077  |
| N  | 4.093340  | -1.095333 | -0.039104 |
| C  | 5.365688  | -0.562601 | -0.116524 |
| C  | 6.352189  | -1.655996 | -0.088302 |
| C  | 5.637753  | -2.823554 | 0.047724  |
| C  | 5.654307  | 0.786957  | -0.182767 |
| C  | 4.739661  | 1.876434  | -0.131467 |
| C  | 5.129109  | 3.283981  | -0.114436 |
| C  | 3.968890  | 4.007463  | -0.012436 |
| C  | 2.874611  | 3.035999  | 0.022052  |
| N  | 3.396854  | 1.746886  | -0.060319 |
| C  | 6.540773  | 3.782277  | -0.181660 |

|    |           |           |           |
|----|-----------|-----------|-----------|
| C  | 1.531417  | 3.342358  | 0.129689  |
| C  | 3.811884  | 5.498171  | 0.091175  |
| C  | 3.749019  | 6.004324  | 1.546786  |
| C  | 6.154335  | -4.220691 | 0.192217  |
| C  | 7.795686  | -1.452242 | -0.150560 |
| C  | 8.686855  | -2.294934 | -0.694009 |
| C  | -0.921087 | -4.013606 | -1.387194 |
| C  | 0.687916  | -4.406530 | 2.052762  |
| C  | -1.584036 | 4.044657  | 0.530956  |
| O  | -3.970779 | 1.225101  | 0.514003  |
| Zn | -5.516796 | 0.176659  | 0.143571  |
| O  | -4.620093 | -1.059813 | -1.125233 |
| C  | -3.367491 | -1.108125 | -1.178353 |
| O  | -2.741552 | -1.398103 | -2.280949 |
| C  | -3.523632 | -1.654510 | -3.486390 |
| H  | 6.702119  | 1.057252  | -0.251643 |
| H  | 6.576791  | 4.872481  | -0.247809 |
| H  | 7.069301  | 3.381565  | -1.055119 |
| H  | 7.113838  | 3.490160  | 0.707549  |
| H  | 2.909072  | 5.815584  | -0.445429 |
| H  | 4.647803  | 5.986274  | -0.421783 |
| H  | 4.665837  | 5.752430  | 2.089508  |
| H  | 2.908232  | 5.558490  | 2.089760  |
| H  | 3.630114  | 7.092448  | 1.567979  |
| H  | 1.280940  | 4.394800  | 0.210794  |
| H  | -0.864811 | 4.866602  | 0.504915  |
| H  | -2.349450 | 4.244713  | -0.228826 |
| H  | -2.087550 | 4.074132  | 1.505519  |
| H  | 8.165781  | -0.521339 | 0.276367  |
| H  | 8.395621  | -3.218973 | -1.183196 |
| H  | 9.747108  | -2.062118 | -0.688468 |
| H  | 7.178481  | -4.215875 | 0.576259  |
| H  | 6.166788  | -4.754497 | -0.767309 |
| H  | 5.539462  | -4.808378 | 0.882087  |
| H  | 3.405558  | -4.377509 | 0.379943  |
| H  | -0.090340 | -5.146352 | 2.269895  |

|   |           |           |           |
|---|-----------|-----------|-----------|
| H | 1.642822  | -4.807713 | 2.405373  |
| H | 0.471649  | -3.498990 | 2.628556  |
| H | 0.955761  | -5.039823 | 0.008305  |
| H | -1.094716 | -5.092435 | -1.315458 |
| H | -1.820046 | -3.551814 | -1.798833 |
| H | -0.103496 | -3.849278 | -2.097688 |
| H | -1.400981 | -3.617915 | 0.686829  |
| H | -2.784838 | -1.902155 | -4.245239 |
| H | -4.077743 | -0.754587 | -3.757181 |
| H | -4.206540 | -2.486771 | -3.311784 |
| H | -2.936237 | -1.333090 | 0.870894  |
| N | -6.957838 | 1.180884  | -0.787458 |
| C | -7.748780 | 1.829291  | -1.326571 |
| C | -8.745673 | 2.641816  | -2.002064 |
| H | -9.514827 | 1.996596  | -2.439549 |
| H | -8.269282 | 3.225748  | -2.796628 |
| H | -9.212482 | 3.324922  | -1.284502 |
| N | -6.429881 | -0.720091 | 1.667351  |
| C | -6.946178 | -1.202581 | 2.582686  |
| C | -7.599328 | -1.806215 | 3.731269  |
| H | -7.174810 | -1.397065 | 4.654230  |
| H | -7.450220 | -2.891011 | 3.714153  |
| H | -8.672537 | -1.590104 | 3.701572  |

### **$C(Zn(CH_3CN)_3)$**

**E: -4098.793135 u.a**

**G: -4098.160188 u.a**

|   |           |           |           |
|---|-----------|-----------|-----------|
| N | -3.750654 | 1.758097  | 0.151616  |
| C | -5.093155 | 1.903792  | 0.216494  |
| C | -5.459880 | 3.315193  | 0.282884  |
| C | -4.286834 | 4.024554  | 0.239664  |
| C | -3.208121 | 3.040226  | 0.156242  |
| C | -6.023195 | 0.827986  | 0.192345  |
| C | -5.753077 | -0.520764 | 0.053604  |
| N | -4.488265 | -1.067897 | -0.036729 |

|    |           |           |           |
|----|-----------|-----------|-----------|
| C  | -4.638536 | -2.406720 | -0.220424 |
| C  | -6.055916 | -2.765148 | -0.233411 |
| C  | -6.754607 | -1.595001 | -0.045963 |
| C  | -3.571322 | -3.305799 | -0.406551 |
| C  | -2.204823 | -3.044096 | -0.375425 |
| N  | -1.609330 | -1.854279 | -0.093913 |
| C  | -0.237387 | -2.012085 | -0.049330 |
| C  | 0.133542  | -3.488808 | -0.148315 |
| C  | -1.169247 | -4.105099 | -0.718592 |
| Mg | -2.747036 | -0.045471 | 0.071644  |
| N  | -1.016935 | 1.015309  | 0.098199  |
| C  | 0.169017  | 0.430384  | 0.048889  |
| C  | 1.223302  | 1.392501  | -0.078285 |
| C  | 0.600299  | 2.677841  | -0.096827 |
| C  | -0.781041 | 2.403949  | 0.024765  |
| C  | 2.430972  | 0.706060  | -0.175254 |
| C  | 2.127136  | -0.835613 | 0.000393  |
| C  | 0.604818  | -0.924073 | 0.050769  |
| O  | 3.615191  | 1.143755  | -0.346041 |
| Zn | 5.262585  | 0.142492  | -0.103907 |
| N  | 6.271256  | 1.507847  | -1.390200 |
| C  | 6.646781  | 2.340020  | -2.100111 |
| C  | 7.124722  | 3.385573  | -2.993512 |
| C  | 2.944656  | -1.222151 | 1.219776  |
| O  | 2.261865  | -1.533243 | 2.296017  |
| C  | 3.001299  | -1.816563 | 3.514130  |
| C  | 1.272882  | 4.006399  | -0.229172 |
| C  | -1.857647 | 3.330753  | 0.084185  |
| C  | -1.114510 | -4.351114 | -2.238778 |
| C  | 0.490700  | -4.116426 | 1.213513  |
| C  | -8.195955 | -1.372311 | 0.005898  |
| C  | -9.109353 | -2.227835 | 0.488736  |
| C  | -6.591795 | -4.144463 | -0.457643 |
| C  | -6.864034 | 3.832508  | 0.366495  |
| C  | -4.105047 | 5.516191  | 0.232666  |
| C  | -4.010393 | 6.112227  | -1.186539 |

|   |            |           |           |
|---|------------|-----------|-----------|
| O | 4.184460   | -1.173614 | 1.203652  |
| N | 5.877207   | -1.466784 | -1.215437 |
| C | 6.279875   | -2.366699 | -1.819137 |
| C | 6.784607   | -3.499075 | -2.580621 |
| H | -7.067947  | 1.109269  | 0.264247  |
| H | -6.882892  | 4.916749  | 0.502749  |
| H | -7.409856  | 3.385592  | 1.206287  |
| H | -7.431566  | 3.608529  | -0.545799 |
| H | -3.205921  | 5.783872  | 0.801726  |
| H | -4.941157  | 5.985624  | 0.762570  |
| H | -4.922710  | 5.911832  | -1.757639 |
| H | -3.169167  | 5.685402  | -1.743902 |
| H | -3.872105  | 7.197287  | -1.137494 |
| H | -1.589655  | 4.382138  | 0.074005  |
| H | 0.575951   | 4.836413  | -0.090074 |
| H | 2.077709   | 4.116201  | 0.507507  |
| H | 1.730074   | 4.120320  | -1.220735 |
| H | -8.544567  | -0.413971 | -0.376242 |
| H | -8.841229  | -3.181820 | 0.931506  |
| H | -10.165593 | -1.977422 | 0.478648  |
| H | -7.610032  | -4.103616 | -0.855233 |
| H | -6.626877  | -4.727194 | 0.472478  |
| H | -5.975535  | -4.705345 | -1.168324 |
| H | -3.843939  | -4.336913 | -0.606155 |
| H | -0.347661  | -5.096524 | -2.477168 |
| H | -2.073567  | -4.722060 | -2.612832 |
| H | -0.877538  | -3.427522 | -2.779880 |
| H | -1.406150  | -5.051402 | -0.219491 |
| H | 0.654265   | -5.192840 | 1.093877  |
| H | 1.393109   | -3.679664 | 1.644699  |
| H | -0.325021  | -3.976437 | 1.931423  |
| H | 0.973217   | -3.633451 | -0.839969 |
| H | 2.240270   | -2.062202 | 4.252025  |
| H | 3.564943   | -0.931848 | 3.815431  |
| H | 3.677208   | -2.657947 | 3.352672  |
| H | 2.570661   | -1.373001 | -0.850217 |

|   |          |           |           |
|---|----------|-----------|-----------|
| H | 7.839933 | -3.340417 | -2.825006 |
| H | 6.214795 | -3.605435 | -3.509392 |
| H | 6.687467 | -4.416552 | -1.991421 |
| H | 6.920040 | 4.368377  | -2.557141 |
| H | 6.614152 | 3.311242  | -3.958917 |
| H | 8.203008 | 3.280741  | -3.149690 |
| N | 6.512064 | 0.555550  | 1.458617  |
| C | 7.210675 | 0.818083  | 2.340997  |
| C | 8.088186 | 1.148260  | 3.453503  |
| H | 8.163488 | 0.293852  | 4.133704  |
| H | 7.685972 | 2.007871  | 3.999387  |
| H | 9.086221 | 1.397148  | 3.078822  |

**C(Zn(CH<sub>3</sub>CN)<sub>4</sub>)**

**E: -4231.565849 u.a**

**G: -4230.898298 u.a**

|    |          |           |           |
|----|----------|-----------|-----------|
| N  | 4.064106 | 1.740683  | -0.098930 |
| C  | 5.407987 | 1.884491  | -0.167297 |
| C  | 5.777470 | 3.295474  | -0.178546 |
| C  | 4.605929 | 4.005558  | -0.098382 |
| C  | 3.526090 | 3.022063  | -0.047968 |
| C  | 6.333212 | 0.806107  | -0.193258 |
| C  | 6.059533 | -0.547086 | -0.106269 |
| N  | 4.793874 | -1.093379 | -0.027631 |
| C  | 4.940779 | -2.439272 | 0.103040  |
| C  | 6.356383 | -2.801542 | 0.090636  |
| C  | 7.057469 | -1.626582 | -0.056873 |
| C  | 3.871866 | -3.340969 | 0.262985  |
| C  | 2.505777 | -3.073583 | 0.250880  |
| N  | 1.912700 | -1.873133 | 0.018148  |
| C  | 0.538782 | -2.024541 | -0.022814 |
| C  | 0.167212 | -3.504294 | 0.013473  |
| C  | 1.467880 | -4.142564 | 0.563172  |
| Mg | 3.054597 | -0.061986 | -0.084875 |
| N  | 1.328269 | 1.002178  | -0.054441 |
| C  | 0.137602 | 0.420403  | -0.016704 |

|    |           |           |           |
|----|-----------|-----------|-----------|
| C  | -0.908733 | 1.378686  | 0.153924  |
| C  | -0.284360 | 2.656651  | 0.215380  |
| C  | 1.099612  | 2.384694  | 0.073729  |
| C  | -2.130680 | 0.695840  | 0.224957  |
| C  | -1.823797 | -0.846584 | 0.004828  |
| C  | -0.301740 | -0.932127 | -0.070118 |
| O  | -3.303155 | 1.128765  | 0.398323  |
| Zn | -5.015900 | 0.114353  | 0.116946  |
| N  | -6.128181 | 1.517904  | 1.279043  |
| C  | -6.604890 | 2.350148  | 1.924354  |
| C  | -7.209336 | 3.397218  | 2.737074  |
| C  | -2.666180 | -1.219566 | -1.197670 |
| O  | -2.005650 | -1.475216 | -2.306524 |
| C  | -2.779258 | -1.754960 | -3.501717 |
| C  | -0.944699 | 3.983470  | 0.418579  |
| C  | 2.174589  | 3.311312  | 0.044639  |
| C  | 1.415074  | -4.433187 | 2.075234  |
| C  | -0.178512 | -4.074271 | -1.376379 |
| C  | 8.499454  | -1.407315 | -0.112381 |
| C  | 9.405478  | -2.245579 | -0.637352 |
| C  | 6.890489  | -4.189955 | 0.256264  |
| C  | 7.182195  | 3.813564  | -0.249740 |
| C  | 4.429610  | 5.496428  | -0.029038 |
| C  | 4.356001  | 6.035712  | 1.413766  |
| O  | -3.903612 | -1.213477 | -1.145725 |
| N  | -4.810210 | -1.133779 | 1.913729  |
| C  | -4.747467 | -1.704897 | 2.918061  |
| C  | -4.672139 | -2.427033 | 4.181793  |
| H  | 7.378612  | 1.086236  | -0.261564 |
| H  | 7.202257  | 4.902016  | -0.347489 |
| H  | 7.723975  | 3.396064  | -1.107092 |
| H  | 7.753456  | 3.556585  | 0.651501  |
| H  | 3.523761  | 5.789687  | -0.574420 |
| H  | 5.260213  | 5.984401  | -0.551078 |
| H  | 5.274756  | 5.808818  | 1.964378  |
| H  | 3.520266  | 5.589803  | 1.964492  |

|   |           |           |           |
|---|-----------|-----------|-----------|
| H | 4.221783  | 7.122500  | 1.410713  |
| H | 1.907638  | 4.361746  | 0.101580  |
| H | -0.323024 | 4.810257  | 0.063562  |
| H | -1.903514 | 4.028424  | -0.108694 |
| H | -1.154858 | 4.164841  | 1.481430  |
| H | 8.855195  | -0.466483 | 0.305199  |
| H | 9.129676  | -3.179817 | -1.116077 |
| H | 10.462796 | -1.999676 | -0.626216 |
| H | 7.911756  | -4.167124 | 0.647517  |
| H | 6.917160  | -4.735882 | -0.696227 |
| H | 6.277928  | -4.777091 | 0.948780  |
| H | 4.142145  | -4.379900 | 0.421607  |
| H | 0.645907  | -5.182629 | 2.293414  |
| H | 2.373631  | -4.818131 | 2.436351  |
| H | 1.183190  | -3.524538 | 2.643469  |
| H | 1.700882  | -5.074644 | 0.036195  |
| H | -0.346759 | -5.154221 | -1.303266 |
| H | -1.074206 | -3.615380 | -1.797708 |
| H | 0.645363  | -3.907558 | -2.079178 |
| H | -0.677282 | -3.679301 | 0.692230  |
| H | -2.039847 | -1.902224 | -4.286576 |
| H | -3.429657 | -0.908522 | -3.728554 |
| H | -3.377522 | -2.656152 | -3.355258 |
| H | -2.251562 | -1.396031 | 0.853523  |
| H | -5.632967 | -2.368058 | 4.702676  |
| H | -3.896040 | -1.988780 | 4.817047  |
| H | -4.432262 | -3.479013 | 3.998272  |
| H | -6.449872 | 3.853568  | 3.379664  |
| H | -8.001143 | 2.974915  | 3.363602  |
| H | -7.640184 | 4.169109  | 2.091803  |
| N | -6.734673 | -1.036241 | -0.385868 |
| C | -7.644378 | -1.677054 | -0.698434 |
| C | -8.790645 | -2.484431 | -1.094308 |
| H | -8.994685 | -3.243334 | -0.332579 |
| H | -8.583925 | -2.982719 | -2.046602 |
| H | -9.673958 | -1.848390 | -1.208805 |



|   |           |          |           |
|---|-----------|----------|-----------|
| N | -5.413866 | 1.335806 | -1.666141 |
| C | -5.544196 | 2.073885 | -2.547188 |
| C | -5.712749 | 3.000806 | -3.659610 |
| H | -6.222628 | 2.502216 | -4.489801 |
| H | -4.735552 | 3.355113 | -4.002215 |
| H | -6.310124 | 3.860988 | -3.341771 |

### 2.b.2. Case of cooper (Cu)

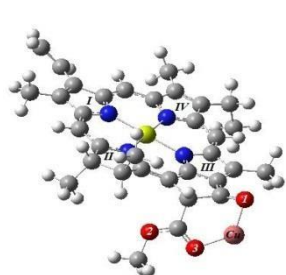

$C(Cu)$

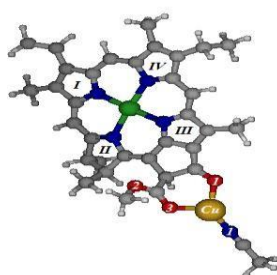

$C(Cu(CH_3CN))$

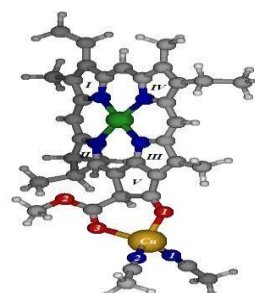

$C(Cu(CH_3CN)_2)$

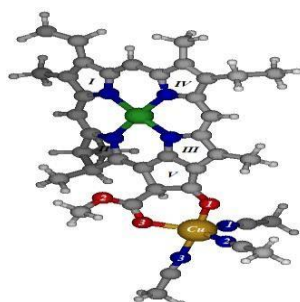

$C(Cu(CH_3CN)_3)$

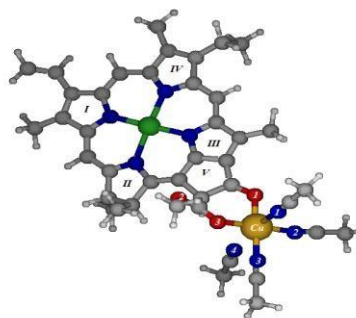

$C(Cu(CH_3CN)_4)$

Cartesian coordinates

#### $C(Cu)$

**E: -3561.506307 u.a**

**G: -3560.991516 u.a**

|   |           |           |           |
|---|-----------|-----------|-----------|
| C | -2.154132 | -0.703163 | -0.364970 |
| C | -1.630367 | 0.611096  | -0.263076 |
| C | -2.597123 | 1.647723  | -0.486537 |
| C | -3.862319 | 1.040184  | -0.767389 |
| C | -3.677101 | -0.527821 | -0.515477 |

|    |           |           |           |
|----|-----------|-----------|-----------|
| C  | -1.911337 | 2.859621  | -0.499855 |
| C  | -0.515250 | 2.488821  | -0.266243 |
| N  | -0.401447 | 1.101697  | -0.138660 |
| Mg | 1.247450  | -0.071627 | -0.066492 |
| N  | -0.004887 | -1.799637 | -0.261871 |
| C  | 0.498862  | -3.053828 | -0.278014 |
| C  | -0.590723 | -4.102237 | -0.397568 |
| C  | -1.829677 | -3.255582 | -0.782646 |
| C  | -1.379970 | -1.847784 | -0.437412 |
| C  | 1.858790  | -3.412968 | -0.166775 |
| C  | 2.971904  | -2.588832 | -0.034389 |
| N  | 2.913893  | -1.211755 | 0.014982  |
| C  | 4.192270  | -0.763784 | 0.129433  |
| C  | 5.130139  | -1.904574 | 0.165093  |
| C  | 4.360996  | -3.040220 | 0.066793  |
| C  | 4.568761  | 0.594774  | 0.166898  |
| C  | 3.737809  | 1.712401  | 0.099156  |
| C  | 4.194455  | 3.108700  | 0.104012  |
| C  | 3.071080  | 3.884407  | -0.007528 |
| C  | 1.937143  | 2.955727  | -0.070026 |
| N  | 2.366768  | 1.661587  | -0.000558 |
| C  | 5.624279  | 3.535647  | 0.209369  |
| C  | 0.581763  | 3.341400  | -0.214199 |
| C  | 2.966691  | 5.382703  | -0.028533 |
| C  | 2.627880  | 5.992408  | 1.347624  |
| C  | 4.800140  | -4.469102 | 0.096155  |
| C  | 6.573505  | -1.762840 | 0.310712  |
| C  | 7.498949  | -2.591314 | -0.199338 |
| C  | -2.183381 | -3.381797 | -2.282127 |
| C  | -0.767570 | -4.893186 | 0.916087  |
| C  | -2.444851 | 4.234841  | -0.715997 |
| C  | -4.478718 | -0.983705 | 0.724184  |
| O  | -5.399780 | -0.316069 | 1.244712  |
| O  | -4.139127 | -2.147365 | 1.195117  |
| C  | -4.886526 | -2.672771 | 2.344606  |
| H  | 5.632502  | 0.793087  | 0.233264  |

|    |           |           |           |
|----|-----------|-----------|-----------|
| H  | 5.724443  | 4.620201  | 0.130405  |
| H  | 6.236455  | 3.087922  | -0.582838 |
| H  | 6.060764  | 3.234105  | 1.169862  |
| H  | 2.212177  | 5.691429  | -0.763367 |
| H  | 3.912594  | 5.802873  | -0.385110 |
| H  | 3.398579  | 5.749390  | 2.085806  |
| H  | 1.670456  | 5.621556  | 1.731128  |
| H  | 2.562623  | 7.081948  | 1.271402  |
| H  | 0.387934  | 4.404648  | -0.307244 |
| H  | -1.859886 | 4.774826  | -1.469274 |
| H  | -3.483747 | 4.204349  | -1.051252 |
| H  | -2.398085 | 4.825201  | 0.209036  |
| H  | 6.915887  | -0.900591 | 0.880682  |
| H  | 7.244965  | -3.444550 | -0.819935 |
| H  | 8.556071  | -2.413400 | -0.029391 |
| H  | 5.747281  | -4.568779 | 0.634537  |
| H  | 4.955747  | -4.868106 | -0.914832 |
| H  | 4.062970  | -5.109509 | 0.590715  |
| H  | 2.054361  | -4.479405 | -0.202078 |
| H  | -1.569443 | -5.629511 | 0.802009  |
| H  | 0.145046  | -5.433583 | 1.184299  |
| H  | -1.023171 | -4.226887 | 1.747844  |
| H  | -0.335150 | -4.809909 | -1.195154 |
| H  | -2.455407 | -4.416647 | -2.512023 |
| H  | -3.030409 | -2.746606 | -2.560390 |
| H  | -1.333610 | -3.104283 | -2.915052 |
| H  | -2.701917 | -3.539590 | -0.188648 |
| H  | -4.433781 | -3.640631 | 2.546214  |
| H  | -5.938050 | -2.774453 | 2.074545  |
| H  | -4.770393 | -1.994261 | 3.190048  |
| H  | -4.098004 | -1.068710 | -1.374922 |
| O  | -4.839892 | 1.572457  | -1.402956 |
| Cu | -5.718184 | 1.185942  | 0.158043  |

***C(Cu(CH3CN))***

**E: -3694.351283 u.a**

**G: -3693.796654 u.a**

|    |           |           |           |
|----|-----------|-----------|-----------|
| C  | 1.489154  | -0.697631 | 0.104747  |
| C  | 0.944188  | 0.612809  | 0.105513  |
| C  | 1.922735  | 1.657355  | 0.013883  |
| C  | 3.217615  | 1.054934  | -0.050757 |
| C  | 3.006878  | -0.512177 | 0.082216  |
| C  | 1.240282  | 2.869848  | 0.003978  |
| C  | -0.172622 | 2.488949  | 0.091176  |
| N  | -0.292766 | 1.099171  | 0.140051  |
| Mg | -1.931848 | -0.080177 | 0.075233  |
| N  | -0.657071 | -1.792781 | -0.081948 |
| C  | -1.145879 | -3.013312 | -0.389706 |
| C  | -0.038210 | -3.997404 | -0.709078 |
| C  | 1.211315  | -3.285351 | -0.130634 |
| C  | 0.729760  | -1.847919 | -0.016747 |
| C  | -2.507001 | -3.380981 | -0.459162 |
| C  | -3.634441 | -2.580559 | -0.305730 |
| N  | -3.591893 | -1.217921 | -0.102029 |
| C  | -4.878589 | -0.779399 | -0.060545 |
| C  | -5.807084 | -1.918104 | -0.208874 |
| C  | -5.024308 | -3.036322 | -0.375696 |
| C  | -5.263835 | 0.568745  | 0.085518  |
| C  | -4.435572 | 1.689533  | 0.150682  |
| C  | -4.897865 | 3.081936  | 0.219971  |
| C  | -3.773803 | 3.864526  | 0.216006  |
| C  | -2.633392 | 2.943666  | 0.155547  |
| N  | -3.061666 | 1.647116  | 0.125406  |
| C  | -6.333589 | 3.500168  | 0.267395  |
| C  | -1.273400 | 3.338255  | 0.121693  |
| C  | -3.677490 | 5.363695  | 0.230648  |
| C  | -3.507968 | 5.978410  | -1.174393 |
| C  | -5.454793 | -4.445825 | -0.626764 |
| C  | -7.259288 | -1.787668 | -0.210635 |
| C  | -8.130009 | -2.709335 | 0.230335  |
| C  | 1.620418  | -3.898054 | 1.226474  |
| C  | 0.048451  | -4.261250 | -2.228365 |

|    |           |           |           |
|----|-----------|-----------|-----------|
| C  | 1.788125  | 4.252865  | -0.087421 |
| O  | 4.339472  | 1.571088  | -0.144803 |
| Cu | 5.928651  | 0.450629  | -0.086407 |
| O  | 5.080330  | -0.785286 | 1.240899  |
| C  | 3.850953  | -0.882390 | 1.294783  |
| O  | 3.189581  | -1.199701 | 2.384428  |
| C  | 3.974429  | -1.448408 | 3.590842  |
| H  | -6.330278 | 0.759467  | 0.125386  |
| H  | -6.431386 | 4.582528  | 0.376090  |
| H  | -6.860177 | 3.033178  | 1.108500  |
| H  | -6.863651 | 3.213301  | -0.649582 |
| H  | -2.843042 | 5.675035  | 0.871813  |
| H  | -4.577483 | 5.777038  | 0.697325  |
| H  | -4.360749 | 5.733808  | -1.815485 |
| H  | -2.602602 | 5.610976  | -1.670763 |
| H  | -3.437343 | 7.068085  | -1.104251 |
| H  | -1.077912 | 4.405212  | 0.113983  |
| H  | 1.489547  | 4.854552  | 0.780307  |
| H  | 2.878752  | 4.239827  | -0.136547 |
| H  | 1.410262  | 4.768306  | -0.979387 |
| H  | -7.657147 | -0.851560 | -0.599063 |
| H  | -7.815908 | -3.646900 | 0.677747  |
| H  | -9.199376 | -2.530303 | 0.180914  |
| H  | -6.447076 | -4.468678 | -1.086653 |
| H  | -5.511956 | -5.025889 | 0.303670  |
| H  | -4.762186 | -4.968336 | -1.294353 |
| H  | -2.686984 | -4.430757 | -0.665158 |
| H  | 0.869415  | -4.953671 | -2.439424 |
| H  | -0.874904 | -4.709480 | -2.607258 |
| H  | 0.228565  | -3.333568 | -2.783220 |
| H  | -0.219763 | -4.951580 | -0.201530 |
| H  | 1.884836  | -4.950672 | 1.085031  |
| H  | 2.477224  | -3.386228 | 1.665361  |
| H  | 0.793847  | -3.847838 | 1.943769  |
| H  | 2.060837  | -3.351092 | -0.820865 |
| H  | 3.241175  | -1.712706 | 4.349771  |

|   |           |           |           |
|---|-----------|-----------|-----------|
| H | 4.516441  | -0.542216 | 3.865661  |
| H | 4.673992  | -2.266455 | 3.413703  |
| H | 3.488603  | -0.988279 | -0.782877 |
| N | 7.486483  | 0.309969  | -0.982322 |
| C | 8.526072  | 0.264077  | -1.493705 |
| C | 9.823419  | 0.203854  | -2.148388 |
| H | 10.220062 | -0.815782 | -2.106701 |
| H | 10.523929 | 0.878059  | -1.644535 |
| H | 9.729135  | 0.509624  | -3.195528 |

**C(Cu(CH<sub>3</sub>CN)<sub>2</sub>)**

**E: -3827.153670 u.a**

**G: -3826.564088 u.a**

|    |           |           |           |
|----|-----------|-----------|-----------|
| C  | -0.999973 | -0.838511 | -0.044164 |
| C  | -0.523106 | 0.493419  | 0.013542  |
| C  | -1.549872 | 1.479410  | 0.196312  |
| C  | -2.815720 | 0.799477  | 0.272519  |
| C  | -2.525220 | -0.738297 | 0.034971  |
| C  | -0.931528 | 2.718650  | 0.255060  |
| C  | 0.498665  | 2.419219  | 0.101291  |
| N  | 0.688061  | 1.045076  | -0.031211 |
| Mg | 2.384101  | -0.049145 | -0.083547 |
| N  | 1.204627  | -1.830309 | 0.014552  |
| C  | 1.765297  | -3.042376 | 0.232833  |
| C  | 0.715781  | -4.097442 | 0.524745  |
| C  | -0.581951 | -3.417451 | 0.019110  |
| C  | -0.176132 | -1.952995 | -0.015120 |
| C  | 3.141214  | -3.340698 | 0.240051  |
| C  | 4.221899  | -2.471950 | 0.096543  |
| N  | 4.104158  | -1.106922 | -0.027655 |
| C  | 5.367016  | -0.598242 | -0.089067 |
| C  | 6.354314  | -1.694597 | -0.037219 |
| C  | 5.634314  | -2.858671 | 0.093831  |
| C  | 5.677673  | 0.770991  | -0.172881 |
| C  | 4.790011  | 1.849980  | -0.147112 |
| C  | 5.178420  | 3.266311  | -0.157216 |

|    |           |           |           |
|----|-----------|-----------|-----------|
| C  | 4.017773  | 3.987604  | -0.069209 |
| C  | 2.927396  | 3.007196  | -0.018448 |
| N  | 3.423837  | 1.734385  | -0.075224 |
| C  | 6.588413  | 3.761380  | -0.233582 |
| C  | 1.553072  | 3.326756  | 0.084097  |
| C  | 3.845795  | 5.478340  | 0.001764  |
| C  | 3.716080  | 6.010296  | 1.444119  |
| C  | 6.142419  | -4.256313 | 0.250045  |
| C  | 7.797782  | -1.491358 | -0.079645 |
| C  | 8.693974  | -2.340970 | -0.605533 |
| C  | -0.988918 | -3.961281 | -1.367729 |
| C  | 0.684437  | -4.446719 | 2.028238  |
| C  | -1.541921 | 4.065926  | 0.445548  |
| O  | -3.949694 | 1.246455  | 0.454782  |
| Cu | -5.666130 | 0.202979  | 0.235595  |
| O  | -4.608169 | -1.080375 | -1.093104 |
| C  | -3.383576 | -1.084529 | -1.174202 |
| O  | -2.717841 | -1.279104 | -2.301025 |
| C  | -3.511828 | -1.505767 | -3.498935 |
| H  | 6.730593  | 1.020636  | -0.238906 |
| H  | 6.626153  | 4.850084  | -0.314051 |
| H  | 7.113693  | 3.346040  | -1.102055 |
| H  | 7.160162  | 3.478612  | 0.659453  |
| H  | 2.965310  | 5.777664  | -0.580814 |
| H  | 4.699310  | 5.962768  | -0.483871 |
| H  | 4.611042  | 5.777961  | 2.030014  |
| H  | 2.856131  | 5.570478  | 1.961894  |
| H  | 3.587757  | 7.097052  | 1.436783  |
| H  | 1.302691  | 4.379509  | 0.159721  |
| H  | -1.297701 | 4.733423  | -0.390354 |
| H  | -2.628816 | 3.993878  | 0.521753  |
| H  | -1.165288 | 4.544664  | 1.358249  |
| H  | 8.164370  | -0.559837 | 0.348666  |
| H  | 8.406927  | -3.265929 | -1.095345 |
| H  | 9.754762  | -2.112125 | -0.584488 |
| H  | 7.156267  | -4.253991 | 0.660629  |

|   |           |           |           |
|---|-----------|-----------|-----------|
| H | 6.179520  | -4.785968 | -0.710997 |
| H | 5.508284  | -4.844353 | 0.921405  |
| H | 3.382763  | -4.388942 | 0.381007  |
| H | -0.095532 | -5.189781 | 2.222551  |
| H | 1.639373  | -4.866858 | 2.357955  |
| H | 0.475269  | -3.560027 | 2.637402  |
| H | 0.928274  | -5.012424 | -0.039744 |
| H | -1.204192 | -5.031725 | -1.290561 |
| H | -1.873532 | -3.459032 | -1.759643 |
| H | -0.177379 | -3.828197 | -2.091654 |
| H | -1.412090 | -3.569770 | 0.719203  |
| H | -2.784371 | -1.658899 | -4.293787 |
| H | -4.132620 | -0.630829 | -3.699536 |
| H | -4.142014 | -2.386949 | -3.367414 |
| H | -2.957078 | -1.288156 | 0.882178  |
| N | -6.987008 | 0.943267  | -0.903746 |
| C | -7.862381 | 1.383620  | -1.521650 |
| C | -8.970131 | 1.932573  | -2.291535 |
| H | -9.571653 | 1.120772  | -2.712919 |
| H | -8.590879 | 2.554607  | -3.108464 |
| H | -9.606346 | 2.545977  | -1.645471 |
| N | -6.400415 | -0.473239 | 1.833256  |
| C | -6.968353 | -0.813196 | 2.784658  |
| C | -7.694513 | -1.234665 | 3.974581  |
| H | -7.289755 | -0.733135 | 4.859458  |
| H | -7.603371 | -2.317518 | 4.106900  |
| H | -8.754405 | -0.978647 | 3.876481  |

**C(Cu(CH<sub>3</sub>CN)<sub>3</sub>)**

**E: -3959.930353 u.a**

**G: -3959.298827 u.a**

|   |          |          |           |
|---|----------|----------|-----------|
| N | 3.736740 | 1.702636 | -0.158486 |
| C | 5.082500 | 1.816524 | -0.206156 |
| C | 5.485124 | 3.219203 | -0.245198 |
| C | 4.329576 | 3.956847 | -0.204040 |
| C | 3.225805 | 2.998090 | -0.149049 |



|    |           |           |           |
|----|-----------|-----------|-----------|
| C  | 5.986114  | 0.717026  | -0.189786 |
| C  | 5.682101  | -0.626116 | -0.075929 |
| N  | 4.402820  | -1.143655 | -0.006972 |
| C  | 4.519004  | -2.487636 | 0.156889  |
| C  | 5.926473  | -2.881875 | 0.178038  |
| C  | 6.656013  | -1.726620 | 0.016179  |
| C  | 3.427010  | -3.363752 | 0.319354  |
| C  | 2.069058  | -3.069377 | 0.277703  |
| N  | 1.504839  | -1.859079 | 0.007732  |
| C  | 0.132921  | -1.983984 | -0.055928 |
| C  | -0.275156 | -3.452142 | 0.011885  |
| C  | 1.002811  | -4.107817 | 0.593929  |
| Mg | 2.689365  | -0.076803 | -0.122172 |
| N  | 0.986058  | 1.026874  | -0.148583 |
| C  | -0.214184 | 0.469546  | -0.121705 |
| C  | -1.246290 | 1.455863  | 0.005639  |
| C  | -0.594058 | 2.725286  | 0.045964  |
| C  | 0.782621  | 2.418672  | -0.058391 |
| C  | -2.472552 | 0.796463  | 0.049671  |
| C  | -2.201073 | -0.750124 | -0.117095 |
| C  | -0.682809 | -0.872376 | -0.153448 |
| O  | -3.652067 | 1.271201  | 0.127454  |
| Cu | -5.215437 | 0.166718  | 0.121187  |
| N  | -5.094421 | -0.140091 | 2.160510  |
| C  | -5.072107 | -0.161208 | 3.316874  |
| C  | -5.042823 | -0.190005 | 4.772437  |
| C  | -3.035261 | -1.113044 | -1.331450 |
| O  | -2.381109 | -1.436990 | -2.417279 |
| C  | -3.149117 | -1.684452 | -3.629848 |
| C  | -1.236006 | 4.068449  | 0.182192  |
| C  | 1.882297  | 3.320298  | -0.089020 |
| C  | 0.919479  | -4.369514 | 2.110300  |
| C  | -0.619918 | -4.047464 | -1.367924 |
| C  | 8.102553  | -1.538902 | -0.018869 |
| C  | 8.998978  | -2.410568 | -0.505048 |
| C  | 6.425508  | -4.277574 | 0.385290  |

|   |           |           |           |
|---|-----------|-----------|-----------|
| C | 6.902783  | 3.701741  | -0.303945 |
| C | 4.184624  | 5.452197  | -0.175500 |
| C | 4.084812  | 6.028038  | 1.251785  |
| O | -4.273733 | -1.031379 | -1.292104 |
| N | -6.808862 | -1.000237 | -0.064506 |
| C | -7.727417 | -1.683289 | -0.217014 |
| C | -8.885180 | -2.543520 | -0.411274 |
| H | 7.038060  | 0.973899  | -0.246502 |
| H | 6.951062  | 4.788154  | -0.412221 |
| H | 7.444296  | 3.262102  | -1.150362 |
| H | 7.455857  | 3.439855  | 0.607077  |
| H | 3.300603  | 5.751228  | -0.752556 |
| H | 5.039498  | 5.908581  | -0.686329 |
| H | 4.983454  | 5.795505  | 1.832287  |
| H | 3.224936  | 5.614676  | 1.790571  |
| H | 3.974960  | 7.116846  | 1.217848  |
| H | 1.639863  | 4.377599  | -0.066583 |
| H | -0.514220 | 4.882066  | 0.077858  |
| H | -2.014730 | 4.210407  | -0.576772 |
| H | -1.720673 | 4.178643  | 1.160905  |
| H | 8.471232  | -0.594650 | 0.379038  |
| H | 8.711570  | -3.351478 | -0.963336 |
| H | 10.060883 | -2.186427 | -0.482341 |
| H | 7.439432  | -4.268488 | 0.795668  |
| H | 6.457669  | -4.845334 | -0.554091 |
| H | 5.787227  | -4.834911 | 1.079061  |
| H | 3.672821  | -4.403731 | 0.507186  |
| H | 0.129211  | -5.096198 | 2.328709  |
| H | 1.862625  | -4.770967 | 2.493177  |
| H | 0.700240  | -3.445968 | 2.659083  |
| H | 1.223189  | -5.054198 | 0.087704  |
| H | -0.816032 | -5.120370 | -1.268784 |
| H | -1.499976 | -3.578547 | -1.810815 |
| H | 0.215005  | -3.919368 | -2.065677 |
| H | -1.131537 | -3.588488 | 0.684444  |
| H | -2.403957 | -1.920124 | -4.386669 |

|   |           |           |           |
|---|-----------|-----------|-----------|
| H | -3.710409 | -0.787618 | -3.896838 |
| H | -3.828112 | -2.523783 | -3.472224 |
| H | -2.657224 | -1.280560 | 0.731877  |
| H | -9.737423 | -2.154872 | 0.155212  |
| H | -8.657976 | -3.557155 | -0.066099 |
| H | -9.147355 | -2.577923 | -1.473567 |
| H | -4.167408 | 0.355873  | 5.138114  |
| H | -4.994113 | -1.225047 | 5.125227  |
| H | -5.947683 | 0.280195  | 5.170657  |
| N | -6.302428 | 1.824011  | -0.485235 |
| C | -6.814540 | 2.804219  | -0.822342 |
| C | -7.458117 | 4.038992  | -1.248690 |
| H | -7.892076 | 3.908729  | -2.245096 |
| H | -6.722153 | 4.848391  | -1.282446 |
| H | -8.252635 | 4.307809  | -0.545437 |

**$C(\text{Cu}(\text{CH}_3\text{CN})_4)$**

**E: -4092.699354 u.a**

**G: -4092.030260 u.a**

|   |          |           |           |
|---|----------|-----------|-----------|
| N | 4.035470 | 1.735687  | -0.065869 |
| C | 5.381326 | 1.860312  | -0.113328 |
| C | 5.773894 | 3.265021  | -0.072655 |
| C | 4.613364 | 3.991096  | 0.018320  |
| C | 3.516916 | 3.023862  | 0.022807  |
| C | 6.290658 | 0.768227  | -0.162324 |
| C | 5.994861 | -0.581772 | -0.118351 |
| N | 4.719565 | -1.109555 | -0.070876 |
| C | 4.843645 | -2.460084 | 0.026245  |
| C | 6.253603 | -2.845328 | 0.022208  |
| C | 6.975175 | -1.678732 | -0.085858 |
| C | 3.757963 | -3.347837 | 0.150497  |
| C | 2.397055 | -3.057823 | 0.125141  |
| N | 1.825809 | -1.842831 | -0.091204 |
| C | 0.451124 | -1.973014 | -0.158396 |
| C | 0.057766 | -3.447686 | -0.162115 |
| C | 1.337829 | -4.115071 | 0.401172  |

|    |           |           |           |
|----|-----------|-----------|-----------|
| Mg | 2.998199  | -0.049493 | -0.124290 |
| N  | 1.287973  | 1.041553  | -0.081569 |
| C  | 0.089975  | 0.477077  | -0.081438 |
| C  | -0.944963 | 1.446608  | 0.113371  |
| C  | -0.300357 | 2.713319  | 0.230915  |
| C  | 1.078381  | 2.423569  | 0.096083  |
| C  | -2.169554 | 0.776668  | 0.139650  |
| C  | -1.892074 | -0.751589 | -0.131115 |
| C  | -0.371357 | -0.865575 | -0.190447 |
| O  | -3.344954 | 1.228042  | 0.304743  |
| Cu | -4.939474 | 0.191101  | 0.019946  |
| N  | -5.840028 | 1.253687  | 1.459675  |
| C  | -6.268475 | 1.963992  | 2.262695  |
| C  | -6.808937 | 2.854505  | 3.280121  |
| C  | -2.728083 | -1.048530 | -1.358008 |
| O  | -2.085289 | -1.396497 | -2.443154 |
| C  | -2.857072 | -1.601661 | -3.659763 |
| C  | -0.947434 | 4.040636  | 0.465630  |
| C  | 2.170541  | 3.332378  | 0.111261  |
| C  | 1.252951  | -4.428389 | 1.907361  |
| C  | -0.263707 | -3.986846 | -1.570235 |
| C  | 8.420884  | -1.481281 | -0.118646 |
| C  | 9.319234  | -2.320556 | -0.655189 |
| C  | 6.762776  | -4.246193 | 0.158292  |
| C  | 7.187818  | 3.760842  | -0.109706 |
| C  | 4.459900  | 5.481324  | 0.136973  |
| C  | 4.371844  | 5.970767  | 1.596734  |
| O  | -3.964368 | -0.911121 | -1.342389 |
| N  | -4.470660 | -1.563631 | 1.972852  |
| C  | -4.433139 | -2.201269 | 2.941164  |
| C  | -4.389511 | -3.004942 | 4.159437  |
| H  | 7.340947  | 1.033914  | -0.209567 |
| H  | 7.227571  | 4.851485  | -0.168288 |
| H  | 7.732346  | 3.364608  | -0.975353 |
| H  | 7.743631  | 3.461838  | 0.788189  |
| H  | 3.568042  | 5.808609  | -0.412064 |

|   |           |           |           |
|---|-----------|-----------|-----------|
| H | 5.306741  | 5.972847  | -0.354577 |
| H | 5.277204  | 5.707930  | 2.153442  |
| H | 3.519280  | 5.521442  | 2.118173  |
| H | 4.257005  | 7.059214  | 1.629749  |
| H | 1.921575  | 4.384704  | 0.201050  |
| H | -0.249087 | 4.869601  | 0.325763  |
| H | -1.792513 | 4.192228  | -0.215811 |
| H | -1.344538 | 4.112107  | 1.486865  |
| H | 8.786694  | -0.557411 | 0.327050  |
| H | 9.033857  | -3.237327 | -1.161248 |
| H | 10.380147 | -2.092333 | -0.626132 |
| H | 7.779314  | -4.250382 | 0.562218  |
| H | 6.792152  | -4.767792 | -0.807620 |
| H | 6.132233  | -4.840583 | 0.828100  |
| H | 4.009103  | -4.394279 | 0.289719  |
| H | 0.468175  | -5.168836 | 2.099015  |
| H | 2.198438  | -4.834814 | 2.279194  |
| H | 1.025343  | -3.525350 | 2.486180  |
| H | 1.566293  | -5.042317 | -0.136038 |
| H | -0.442967 | -5.066299 | -1.520692 |
| H | -1.146571 | -3.512358 | -2.000389 |
| H | 0.576296  | -3.815303 | -2.252497 |
| H | -0.803770 | -3.623892 | 0.494312  |
| H | -2.116431 | -1.834619 | -4.422002 |
| H | -3.403566 | -0.689984 | -3.905335 |
| H | -3.551114 | -2.432153 | -3.520793 |
| H | -2.347077 | -1.326762 | 0.686939  |
| H | -5.168918 | -3.772666 | 4.133020  |
| H | -4.548182 | -2.369354 | 5.036021  |
| H | -3.415505 | -3.495047 | 4.252733  |
| H | -5.993241 | 3.395892  | 3.769524  |
| H | -7.356279 | 2.276474  | 4.031191  |
| H | -7.490595 | 3.576507  | 2.819721  |
| N | -6.549106 | -0.937270 | -0.273607 |
| C | -7.473490 | -1.588199 | -0.505841 |
| C | -8.639821 | -2.409789 | -0.796795 |

|   |           |           |           |
|---|-----------|-----------|-----------|
| H | -8.680743 | -3.258374 | -0.106819 |
| H | -8.582354 | -2.786442 | -1.822851 |
| H | -9.551786 | -1.814780 | -0.686012 |
| N | -5.637464 | 1.627568  | -1.702433 |
| C | -5.888865 | 2.453754  | -2.474206 |
| C | -6.209309 | 3.489113  | -3.451006 |
| H | -5.666690 | 3.306662  | -4.383656 |
| H | -5.924743 | 4.471946  | -3.062881 |
| H | -7.283384 | 3.488145  | -3.660795 |

## **2.c. Deprotonation**

### **2.c.1. Case of zinc**

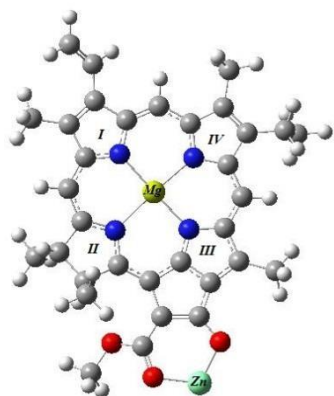

*D(Zn)*

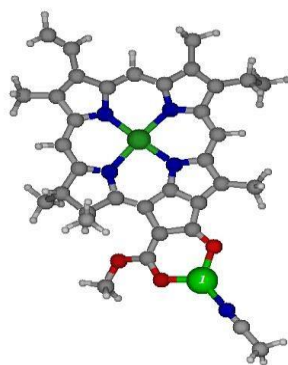

*D(Zn(CH<sub>3</sub>CN))*

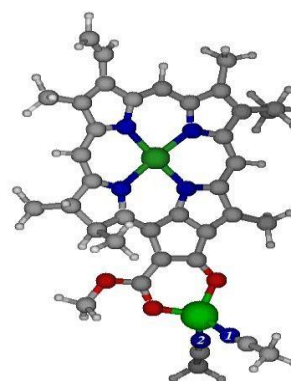

*D(Zn(CH<sub>3</sub>CN)<sub>2</sub>)*

Cartesian coordinates

### **D(Zn)**

**E: -3700.031889 u.a**

**G: -3699.527989 u.a**

|   |           |           |           |
|---|-----------|-----------|-----------|
| C | -3.558562 | -0.097730 | -0.092074 |
| C | -2.112942 | -0.464705 | -0.012521 |
| C | -1.443477 | 0.805416  | -0.032809 |
| C | -2.338664 | 1.896965  | -0.181674 |

|    |           |           |           |
|----|-----------|-----------|-----------|
| C  | -3.648449 | 1.361989  | -0.256940 |
| C  | -1.564360 | 3.070853  | -0.241007 |
| C  | -0.213819 | 2.608638  | -0.127731 |
| N  | -0.178403 | 1.209287  | -0.015622 |
| Mg | 1.373356  | -0.074125 | 0.014177  |
| N  | -0.041595 | -1.708835 | -0.024161 |
| C  | 0.396265  | -2.996957 | -0.070789 |
| C  | -0.762134 | -3.980397 | -0.098898 |
| C  | -1.979127 | -3.062757 | -0.354653 |
| C  | -1.420790 | -1.671713 | -0.087072 |
| C  | 1.716860  | -3.437285 | -0.064559 |
| C  | 2.909063  | -2.688486 | -0.022115 |
| N  | 2.957949  | -1.330800 | 0.008804  |
| C  | 4.289287  | -0.967240 | 0.032282  |
| C  | 5.121054  | -2.175150 | 0.019747  |
| C  | 4.255428  | -3.247620 | -0.010236 |
| C  | 4.753489  | 0.338220  | 0.029246  |
| C  | 3.990729  | 1.533511  | 0.000731  |
| N  | 2.633860  | 1.573805  | -0.021255 |
| C  | 2.277504  | 2.909780  | -0.071992 |
| C  | 3.473458  | 3.739080  | -0.073891 |
| C  | 4.545144  | 2.876880  | -0.025622 |
| C  | 3.492920  | 5.242099  | -0.081686 |
| C  | 3.330776  | 5.861034  | 1.321144  |
| C  | 0.964195  | 3.376947  | -0.135156 |
| C  | 6.007884  | 3.205836  | -0.002619 |
| C  | 6.579902  | -2.160903 | 0.066203  |
| C  | 7.401127  | -3.069888 | -0.480253 |
| C  | 4.582337  | -4.708420 | 0.014046  |
| C  | -2.036020 | 4.477691  | -0.426653 |
| C  | -2.528161 | -3.175888 | -1.790429 |
| C  | -0.870296 | -4.778053 | 1.214068  |
| O  | -4.708999 | 2.118963  | -0.414505 |
| Zn | -6.281433 | 1.235022  | -0.071446 |
| O  | -5.927797 | -0.577856 | 0.031230  |
| C  | -4.678798 | -0.881979 | 0.256769  |

|   |           |           |           |
|---|-----------|-----------|-----------|
| O | -4.464294 | -2.036774 | 0.881360  |
| C | -5.590704 | -2.912807 | 1.113991  |
| H | 2.384962  | 5.556856  | 1.782867  |
| H | 2.700910  | 5.621609  | -0.739786 |
| H | 4.434228  | 5.591383  | -0.520700 |
| H | 3.346584  | 6.954685  | 1.264032  |
| H | 4.141059  | 5.542931  | 1.985506  |
| H | 6.177162  | 4.280387  | -0.110876 |
| H | 6.548601  | 2.704918  | -0.815116 |
| H | 6.477698  | 2.894818  | 0.939313  |
| H | 5.830552  | 0.467597  | 0.028979  |
| H | 7.038789  | -3.912598 | -1.060282 |
| H | 8.478291  | -2.975923 | -0.381964 |
| H | 7.029194  | -1.319356 | 0.592035  |
| H | 4.630413  | -5.136524 | -0.996356 |
| H | 3.833142  | -5.279084 | 0.572716  |
| H | 5.554865  | -4.879216 | 0.485607  |
| H | 1.839106  | -4.514803 | -0.107137 |
| H | 0.838855  | 4.452950  | -0.205712 |
| H | -2.213682 | 4.696741  | -1.488193 |
| H | -1.309196 | 5.207452  | -0.058269 |
| H | -2.982847 | 4.644413  | 0.096082  |
| H | -1.722859 | -5.465335 | 1.173050  |
| H | 0.030985  | -5.371832 | 1.396838  |
| H | -1.011133 | -4.108148 | 2.070116  |
| H | -0.626651 | -4.688576 | -0.925713 |
| H | -2.780795 | -3.292746 | 0.345432  |
| H | -2.896528 | -4.190808 | -1.977337 |
| H | -1.747918 | -2.958020 | -2.528685 |
| H | -3.352909 | -2.476470 | -1.961081 |
| H | -5.156747 | -3.815752 | 1.541968  |
| H | -6.104566 | -3.136971 | 0.176736  |
| H | -6.287521 | -2.456394 | 1.819086  |

**D(Zn(CH<sub>3</sub>CN))**

**E: -3832.871468 u.a**



**G: -3832.327286 u.a**

|    |           |           |           |
|----|-----------|-----------|-----------|
| C  | -2.918584 | -0.621616 | 0.080010  |
| C  | -1.417555 | -0.822615 | 0.093584  |
| C  | -0.907511 | 0.513556  | 0.077441  |
| C  | -1.927423 | 1.494370  | -0.015396 |
| C  | -3.172138 | 0.811220  | -0.032928 |
| C  | -1.300328 | 2.751238  | -0.078498 |
| C  | 0.099481  | 2.451929  | -0.023765 |
| N  | 0.305161  | 1.071433  | 0.065239  |
| Mg | 2.000462  | -0.009343 | 0.029406  |
| N  | 0.797727  | -1.797804 | 0.011578  |
| C  | 1.387177  | -3.020669 | -0.040549 |
| C  | 0.358421  | -4.139106 | -0.023392 |
| C  | -0.966159 | -3.382468 | -0.262448 |
| C  | -0.584471 | -1.929027 | -0.010842 |
| C  | 2.751404  | -3.302355 | -0.073697 |
| C  | 3.842010  | -2.414826 | -0.066347 |
| N  | 3.728825  | -1.060599 | -0.033212 |
| C  | 5.007114  | -0.537133 | -0.049082 |
| C  | 5.977142  | -1.637311 | -0.091447 |
| C  | 5.247789  | -2.805446 | -0.096862 |
| C  | 5.310372  | 0.812433  | -0.059483 |
| C  | 4.404708  | 1.905812  | -0.053227 |
| N  | 3.054462  | 1.780179  | -0.026833 |
| C  | 2.533010  | 3.064017  | -0.051011 |
| C  | 3.619220  | 4.031563  | -0.089891 |
| C  | 4.788658  | 3.306757  | -0.088566 |
| C  | 3.456377  | 5.526112  | -0.088138 |
| C  | 3.284375  | 6.121037  | 1.323610  |
| C  | 1.173760  | 3.363686  | -0.059785 |
| C  | 6.200505  | 3.811920  | -0.115872 |
| C  | 7.424645  | -1.447373 | -0.090168 |
| C  | 8.334145  | -2.249288 | -0.663815 |
| C  | 5.749368  | -4.216232 | -0.084942 |
| C  | -1.941221 | 4.096759  | -0.213904 |
| C  | -1.514095 | -3.572096 | -1.689782 |

|    |           |           |           |
|----|-----------|-----------|-----------|
| C  | 0.377783  | -4.914275 | 1.307376  |
| O  | -4.321431 | 1.441112  | -0.109804 |
| Zn | -5.838704 | 0.418141  | -0.036565 |
| O  | -5.232517 | -1.294344 | 0.290607  |
| C  | -3.947050 | -1.527134 | 0.366016  |
| O  | -3.620678 | -2.758136 | 0.771770  |
| C  | -4.675646 | -3.705141 | 1.015446  |
| H  | 2.405362  | 5.702151  | 1.825770  |
| H  | 2.594226  | 5.807270  | -0.706503 |
| H  | 4.327285  | 5.988342  | -0.567036 |
| H  | 3.163225  | 7.208804  | 1.273160  |
| H  | 4.157152  | 5.904467  | 1.948709  |
| H  | 6.234329  | 4.898706  | -0.232359 |
| H  | 6.771556  | 3.374951  | -0.944566 |
| H  | 6.737065  | 3.566906  | 0.810012  |
| H  | 6.362854  | 1.073053  | -0.094952 |
| H  | 8.059573  | -3.129530 | -1.236312 |
| H  | 9.394545  | -2.025488 | -0.596347 |
| H  | 7.784393  | -0.557405 | 0.425072  |
| H  | 5.812991  | -4.640168 | -1.096440 |
| H  | 5.093198  | -4.870338 | 0.499102  |
| H  | 6.751280  | -4.267180 | 0.352208  |
| H  | 3.000809  | -4.357609 | -0.118365 |
| H  | 0.912027  | 4.416436  | -0.108848 |
| H  | -2.140782 | 4.338723  | -1.266938 |
| H  | -1.309978 | 4.894352  | 0.189577  |
| H  | -2.902090 | 4.124697  | 0.309190  |
| H  | -0.388000 | -5.698497 | 1.303232  |
| H  | 1.348252  | -5.390940 | 1.479121  |
| H  | 0.177237  | -4.245491 | 2.152444  |
| H  | 0.561186  | -4.844410 | -0.839070 |
| H  | -1.723336 | -3.707181 | 0.448555  |
| H  | -1.756951 | -4.626107 | -1.868411 |
| H  | -0.774809 | -3.264257 | -2.438383 |
| H  | -2.419975 | -2.979246 | -1.850464 |
| H  | -4.164739 | -4.627362 | 1.292256  |

|   |            |           |           |
|---|------------|-----------|-----------|
| H | -5.277461  | -3.859303 | 0.116608  |
| H | -5.316259  | -3.368941 | 1.833826  |
| N | -7.671184  | 0.954148  | -0.258437 |
| C | -8.760377  | 1.312451  | -0.401428 |
| C | -10.128617 | 1.762529  | -0.581213 |
| H | -10.661681 | 1.709040  | 0.374197  |
| H | -10.130420 | 2.796956  | -0.941322 |
| H | -10.632140 | 1.122250  | -1.313603 |

### ***D(Zn(CH<sub>3</sub>CN)<sub>2</sub>)***

**E: -3965.675618 u.a**

**G: -3965.094543 u.a**

|    |           |           |           |
|----|-----------|-----------|-----------|
| C  | 2.519076  | -0.692098 | -0.137876 |
| C  | 1.014074  | -0.871481 | -0.153721 |
| C  | 0.522238  | 0.469408  | -0.099549 |
| C  | 1.555592  | 1.431932  | 0.021475  |
| C  | 2.803031  | 0.726993  | 0.021450  |
| C  | 0.949770  | 2.688500  | 0.128111  |
| C  | -0.461197 | 2.413428  | 0.067925  |
| N  | -0.684634 | 1.041696  | -0.063696 |
| Mg | -2.394496 | -0.014562 | -0.051655 |
| N  | -1.215993 | -1.819486 | -0.089268 |
| C  | -1.821169 | -3.034508 | -0.066797 |
| C  | -0.806571 | -4.165863 | -0.116979 |
| C  | 0.529410  | -3.432726 | 0.133276  |
| C  | 0.165534  | -1.967866 | -0.076815 |
| C  | -3.189300 | -3.298721 | -0.036106 |
| C  | -4.268354 | -2.397201 | -0.015991 |
| N  | -4.137065 | -1.043254 | -0.011999 |
| C  | -5.407412 | -0.502573 | 0.021999  |
| C  | -6.391436 | -1.588753 | 0.036915  |
| C  | -5.678072 | -2.767704 | 0.008062  |
| C  | -5.691438 | 0.851941  | 0.070973  |
| C  | -4.772734 | 1.931720  | 0.093126  |
| N  | -3.421817 | 1.788872  | 0.059058  |
| C  | -2.883110 | 3.061842  | 0.121628  |

|    |           |           |           |
|----|-----------|-----------|-----------|
| C  | -3.953375 | 4.042536  | 0.192476  |
| C  | -5.134690 | 3.335252  | 0.171563  |
| C  | -3.768501 | 5.534124  | 0.233585  |
| C  | -3.594917 | 6.166991  | -1.161227 |
| C  | -1.515519 | 3.339792  | 0.137469  |
| C  | -6.538159 | 3.862627  | 0.217514  |
| C  | -7.836212 | -1.379358 | 0.044905  |
| C  | -8.757924 | -2.186644 | 0.591118  |
| C  | -6.201041 | -4.170121 | -0.041380 |
| C  | 1.602901  | 4.028183  | 0.279046  |
| C  | 1.085372  | -3.667738 | 1.550310  |
| C  | -0.842348 | -4.907352 | -1.466221 |
| O  | 3.948911  | 1.331578  | 0.120293  |
| Zn | 5.517126  | 0.297555  | 0.078960  |
| O  | 4.813676  | -1.396041 | -0.386977 |
| C  | 3.537712  | -1.600457 | -0.465368 |
| O  | 3.175018  | -2.806098 | -0.932408 |
| C  | 4.210061  | -3.752713 | -1.237462 |
| H  | -2.724901 | 5.748628  | -1.679248 |
| H  | -2.898491 | 5.784550  | 0.854240  |
| H  | -4.629708 | 5.995854  | 0.730583  |
| H  | -3.457136 | 7.251242  | -1.081696 |
| H  | -4.473920 | 5.980480  | -1.787395 |
| H  | -6.553853 | 4.944729  | 0.375661  |
| H  | -7.117610 | 3.404060  | 1.028584  |
| H  | -7.078619 | 3.662591  | -0.717019 |
| H  | -6.740354 | 1.125567  | 0.116852  |
| H  | -8.496958 | -3.090295 | 1.132659  |
| H  | -9.814871 | -1.944652 | 0.531629  |
| H  | -8.183699 | -0.467178 | -0.439129 |
| H  | -6.274274 | -4.619563 | 0.958503  |
| H  | -5.552975 | -4.818744 | -0.640442 |
| H  | -7.202410 | -4.194884 | -0.482304 |
| H  | -3.452582 | -4.351564 | -0.018403 |
| H  | -1.233558 | 4.385800  | 0.219432  |
| H  | 1.250921  | 4.551821  | 1.176647  |

|   |           |           |           |
|---|-----------|-----------|-----------|
| H | 1.387452  | 4.681319  | -0.576759 |
| H | 2.687809  | 3.919228  | 0.353184  |
| H | -0.087129 | -5.701779 | -1.486205 |
| H | -1.820167 | -5.366113 | -1.645700 |
| H | -0.636368 | -4.219938 | -2.294930 |
| H | -1.014064 | -4.889053 | 0.681924  |
| H | 1.278455  | -3.747741 | -0.590737 |
| H | 1.316354  | -4.729229 | 1.699721  |
| H | 0.355833  | -3.370157 | 2.312730  |
| H | 2.000047  | -3.090170 | 1.717777  |
| H | 3.683894  | -4.652853 | -1.556781 |
| H | 4.822224  | -3.963560 | -0.356877 |
| H | 4.848896  | -3.384450 | -2.043893 |
| N | 6.878143  | 0.977703  | -1.249949 |
| C | 7.497583  | 1.391049  | -2.133315 |
| C | 8.279776  | 1.910956  | -3.243670 |
| H | 7.625868  | 2.461692  | -3.927374 |
| H | 9.056226  | 2.584724  | -2.868063 |
| H | 8.750531  | 1.083838  | -3.784332 |
| N | 6.558496  | 0.294712  | 1.811946  |
| C | 6.972146  | 0.269350  | 2.890528  |
| C | 7.497416  | 0.239208  | 4.246339  |
| H | 8.089480  | -0.669389 | 4.394491  |
| H | 8.131019  | 1.114982  | 4.418301  |
| H | 6.668803  | 0.249367  | 4.961628  |

### 2.c.2 Case of cooper (Cu)

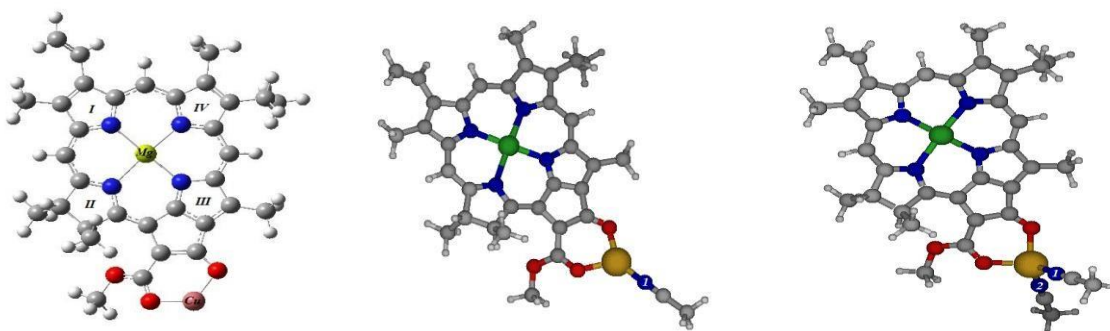

$D(\text{Cu})$

$D(\text{Cu}(\text{CH}_3\text{CN}))$

$D(\text{Cu}(\text{CH}_3\text{CN})_2)$

$D(\text{Cu})$

**E: -3561.202578 u.a**

**G: -3560.700105 u.a**

|    |           |           |           |
|----|-----------|-----------|-----------|
| C  | 4.591080  | 2.776445  | -0.019358 |
| C  | 4.000559  | 1.449337  | 0.001336  |
| N  | 2.634766  | 1.535802  | -0.019195 |
| C  | 2.327955  | 2.871114  | -0.061374 |
| C  | 3.541107  | 3.669195  | -0.062273 |
| C  | 4.715818  | 0.239023  | 0.021071  |
| C  | 4.209949  | -1.064034 | 0.014182  |
| N  | 2.873910  | -1.380306 | -0.013122 |
| C  | 2.781593  | -2.740135 | -0.061250 |
| C  | 4.104083  | -3.339099 | -0.056577 |
| C  | 5.004786  | -2.289570 | -0.011591 |
| C  | 1.562603  | -3.442243 | -0.114051 |
| C  | 0.249466  | -2.966254 | -0.112680 |
| N  | -0.146178 | -1.668783 | -0.039706 |
| C  | -1.520274 | -1.586704 | -0.085702 |
| C  | -2.130508 | -2.950309 | -0.373590 |
| C  | -0.938877 | -3.913412 | -0.157376 |
| Mg | 1.332037  | -0.075151 | 0.012193  |
| N  | -0.182875 | 1.255497  | 0.002957  |
| C  | -1.454313 | 0.904244  | -0.008496 |
| C  | -2.323001 | 2.022903  | -0.127758 |
| C  | -1.531781 | 3.161716  | -0.189612 |
| C  | -0.172440 | 2.663153  | -0.100656 |
| C  | -3.673073 | 1.525689  | -0.160692 |
| C  | -3.585254 | 0.043510  | 0.000548  |
| C  | -2.173475 | -0.354519 | 0.021052  |
| C  | -4.711226 | -0.789776 | 0.390318  |
| O  | -4.405165 | -1.822470 | 1.175492  |
| C  | -5.497070 | -2.677931 | 1.590302  |
| O  | -4.695385 | 2.279794  | -0.297351 |
| Cu | -6.113222 | 1.136356  | -0.378921 |

|   |           |           |           |
|---|-----------|-----------|-----------|
| O | -5.927579 | -0.625828 | 0.068566  |
| C | -1.959150 | 4.588648  | -0.321058 |
| C | 1.011371  | 3.385896  | -0.118147 |
| C | -1.059006 | -4.748637 | 1.130834  |
| C | -2.708616 | -3.013895 | -1.801730 |
| C | 6.463108  | -2.321048 | 0.038970  |
| C | 7.258186  | -3.260281 | -0.495184 |
| C | 4.393113  | -4.808123 | -0.052532 |
| C | 3.601105  | 5.171520  | -0.064696 |
| C | 3.457805  | 5.790516  | 1.340043  |
| C | 6.061011  | 3.068431  | 0.006992  |
| H | 2.502970  | 5.515270  | 1.801660  |
| H | 2.820125  | 5.575242  | -0.721531 |
| H | 4.551195  | 5.495650  | -0.503876 |
| H | 3.507016  | 6.883105  | 1.285679  |
| H | 4.257949  | 5.446148  | 2.003531  |
| H | 6.259681  | 4.131717  | -0.150101 |
| H | 6.597971  | 2.515476  | -0.773089 |
| H | 6.510069  | 2.791254  | 0.969437  |
| H | 5.796904  | 0.331044  | 0.020904  |
| H | 6.874363  | -4.097941 | -1.068385 |
| H | 8.337113  | -3.197606 | -0.392419 |
| H | 6.937596  | -1.490509 | 0.559988  |
| H | 4.484541  | -5.212069 | -1.069703 |
| H | 3.604617  | -5.374870 | 0.452829  |
| H | 5.336169  | -5.013862 | 0.463316  |
| H | 1.649698  | -4.522788 | -0.172734 |
| H | 0.920152  | 4.465735  | -0.188083 |
| H | -1.512405 | 5.061458  | -1.204133 |
| H | -1.653116 | 5.179005  | 0.551810  |
| H | -3.045561 | 4.655245  | -0.410581 |
| H | -1.932781 | -5.407312 | 1.075894  |
| H | -0.175984 | -5.377093 | 1.286176  |
| H | -1.171468 | -4.102729 | 2.009163  |
| H | -0.835073 | -4.597996 | -1.008231 |
| H | -2.927549 | -3.169548 | 0.335988  |

|   |           |           |           |
|---|-----------|-----------|-----------|
| H | -3.110600 | -4.013057 | -2.002503 |
| H | -1.936243 | -2.802911 | -2.550274 |
| H | -3.517027 | -2.289164 | -1.942428 |
| H | -5.028459 | -3.461973 | 2.183674  |
| H | -6.007067 | -3.095806 | 0.719986  |
| H | -6.207943 | -2.111317 | 2.194672  |

**D(Cu(CH<sub>3</sub>CN))**

**E: -3694.035832 u.a**

**G: -3693.494684 u.a**

|    |           |           |           |
|----|-----------|-----------|-----------|
| C  | -2.868591 | -0.568702 | 0.172560  |
| C  | -1.429424 | -0.771052 | 0.136450  |
| C  | -0.894057 | 0.577434  | 0.108023  |
| C  | -1.906414 | 1.571386  | 0.073453  |
| C  | -3.176981 | 0.883905  | 0.088274  |
| C  | -1.273830 | 2.808350  | 0.019534  |
| C  | 0.139176  | 2.493935  | 0.025250  |
| N  | 0.320506  | 1.098431  | 0.077494  |
| Mg | 2.005065  | -0.011736 | 0.022139  |
| N  | 0.757268  | -1.795856 | 0.029311  |
| C  | 1.332196  | -3.037209 | -0.036356 |
| C  | 0.280250  | -4.134209 | 0.004284  |
| C  | -1.035575 | -3.348068 | -0.201727 |
| C  | -0.605151 | -1.907656 | 0.027071  |
| C  | 2.687138  | -3.324031 | -0.098078 |
| C  | 3.802624  | -2.453250 | -0.113283 |
| N  | 3.708059  | -1.098486 | -0.071269 |
| C  | 4.992786  | -0.597664 | -0.107538 |
| C  | 5.942670  | -1.704774 | -0.175711 |
| C  | 5.191385  | -2.867055 | -0.175000 |
| C  | 5.313399  | 0.755967  | -0.114338 |
| C  | 4.437059  | 1.862761  | -0.083012 |
| N  | 3.076338  | 1.761666  | -0.036492 |
| C  | 2.586643  | 3.046290  | -0.039333 |
| C  | 3.679811  | 3.998163  | -0.085436 |
| C  | 4.841824  | 3.253915  | -0.110383 |



|    |           |           |           |
|----|-----------|-----------|-----------|
| C  | 3.541784  | 5.495385  | -0.065770 |
| C  | 3.432773  | 6.080979  | 1.356077  |
| C  | 1.216133  | 3.373701  | -0.021222 |
| C  | 6.258512  | 3.743662  | -0.152584 |
| C  | 7.392363  | -1.539429 | -0.202029 |
| C  | 8.278558  | -2.367962 | -0.774891 |
| C  | 5.677410  | -4.283787 | -0.185698 |
| C  | -1.893160 | 4.169196  | -0.036848 |
| C  | -1.635057 | -3.536160 | -1.609678 |
| C  | 0.314867  | -4.914424 | 1.331630  |
| O  | -4.311411 | 1.430585  | 0.065877  |
| Cu | -5.979866 | 0.528241  | -0.115777 |
| O  | -5.155380 | -1.232530 | 0.168442  |
| C  | -3.959044 | -1.480849 | 0.430851  |
| O  | -3.639053 | -2.630822 | 1.037860  |
| C  | -4.727758 | -3.535760 | 1.323807  |
| H  | 2.564481  | 5.675978  | 1.887621  |
| H  | 2.663667  | 5.797102  | -0.650687 |
| H  | 4.402286  | 5.946035  | -0.573303 |
| H  | 3.330757  | 7.170811  | 1.317394  |
| H  | 4.323386  | 5.843441  | 1.947393  |
| H  | 6.301891  | 4.827596  | -0.288274 |
| H  | 6.821402  | 3.287516  | -0.976013 |
| H  | 6.795523  | 3.510565  | 0.775933  |
| H  | 6.370245  | 0.996890  | -0.165417 |
| H  | 7.981616  | -3.255554 | -1.323901 |
| H  | 9.342998  | -2.158931 | -0.730498 |
| H  | 7.776923  | -0.646788 | 0.289649  |
| H  | 5.769729  | -4.680253 | -1.205830 |
| H  | 5.000620  | -4.948491 | 0.360844  |
| H  | 6.665075  | -4.356190 | 0.280259  |
| H  | 2.924355  | -4.382223 | -0.148618 |
| H  | 0.973976  | 4.432048  | -0.052958 |
| H  | -1.577688 | 4.716989  | -0.933344 |
| H  | -1.605497 | 4.776325  | 0.830665  |
| H  | -2.982770 | 4.093203  | -0.050096 |

|   |            |           |           |
|---|------------|-----------|-----------|
| H | -0.468538  | -5.680411 | 1.342875  |
| H | 1.277705   | -5.415424 | 1.475904  |
| H | 0.151498   | -4.246209 | 2.184961  |
| H | 0.444377   | -4.840048 | -0.819113 |
| H | -1.780287  | -3.642493 | 0.537020  |
| H | -1.910340  | -4.585257 | -1.764535 |
| H | -0.913509  | -3.257558 | -2.386363 |
| H | -2.531902  | -2.925220 | -1.751215 |
| H | -4.259089  | -4.408250 | 1.777903  |
| H | -5.250752  | -3.809064 | 0.404803  |
| H | -5.430596  | -3.072648 | 2.019547  |
| N | -7.693261  | 0.921048  | -0.430129 |
| C | -8.807946  | 1.175577  | -0.630958 |
| C | -10.202777 | 1.505273  | -0.883880 |
| H | -10.773259 | 1.451497  | 0.049161  |
| H | -10.285777 | 2.518916  | -1.289754 |
| H | -10.634377 | 0.799431  | -1.601066 |

***D(Cu(CH<sub>3</sub>CN)<sub>2</sub>)***

**E: -3826.825099 u.a**

**G: -3826.245613 u.a**

|    |           |           |           |
|----|-----------|-----------|-----------|
| C  | 2.455281  | -0.673761 | -0.176041 |
| C  | 1.009869  | -0.843735 | -0.135633 |
| C  | 0.501164  | 0.510150  | -0.137740 |
| C  | 1.529299  | 1.485236  | -0.120140 |
| C  | 2.793606  | 0.776149  | -0.118848 |
| C  | 0.917844  | 2.733340  | -0.101073 |
| C  | -0.501210 | 2.444496  | -0.107771 |
| N  | -0.707250 | 1.055962  | -0.126597 |
| Mg | -2.410810 | -0.020161 | -0.056702 |
| N  | -1.199043 | -1.824865 | -0.013832 |
| C  | -1.798393 | -3.055022 | 0.082775  |
| C  | -0.765376 | -4.170963 | 0.076556  |
| C  | 0.563209  | -3.403287 | 0.265039  |
| C  | 0.160436  | -1.961264 | -0.003148 |
| C  | -3.155768 | -3.316907 | 0.145746  |

|    |           |           |           |
|----|-----------|-----------|-----------|
| C  | -4.254853 | -2.423688 | 0.131300  |
| N  | -4.135290 | -1.073481 | 0.056799  |
| C  | -5.412218 | -0.546459 | 0.072517  |
| C  | -6.381701 | -1.635307 | 0.161440  |
| C  | -5.651892 | -2.810005 | 0.193791  |
| C  | -5.707684 | 0.809947  | 0.044153  |
| C  | -4.809361 | 1.900858  | -0.009509 |
| N  | -3.451804 | 1.773527  | -0.045084 |
| C  | -2.936195 | 3.049493  | -0.072882 |
| C  | -4.012489 | 4.020592  | -0.057537 |
| C  | -5.188196 | 3.298412  | -0.019937 |
| C  | -3.848117 | 5.514262  | -0.114478 |
| C  | -3.731459 | 6.063220  | -1.550159 |
| C  | -1.561718 | 3.348367  | -0.091835 |
| C  | -6.595953 | 3.815534  | 0.001812  |
| C  | -7.828278 | -1.443442 | 0.173978  |
| C  | -8.735155 | -2.242334 | 0.756645  |
| C  | -6.163144 | -4.217464 | 0.233905  |
| C  | 1.561993  | 4.083785  | -0.065005 |
| C  | 1.156531  | -3.563858 | 1.678790  |
| C  | -0.808340 | -4.987071 | -1.228660 |
| O  | 3.932162  | 1.299328  | -0.103646 |
| Cu | 5.670284  | 0.384853  | 0.152145  |
| O  | 4.726700  | -1.385874 | -0.169712 |
| C  | 3.527093  | -1.611865 | -0.414998 |
| O  | 3.173740  | -2.773044 | -0.995476 |
| C  | 4.238379  | -3.707362 | -1.258147 |
| H  | -2.871600 | 5.629326  | -2.072526 |
| H  | -2.963253 | 5.814732  | 0.460907  |
| H  | -4.699487 | 5.993157  | 0.382970  |
| H  | -3.610004 | 7.151903  | -1.539172 |
| H  | -4.627247 | 5.826833  | -2.134182 |
| H  | -6.620039 | 4.901552  | 0.126860  |
| H  | -7.176723 | 3.378533  | 0.823221  |
| H  | -7.128189 | 3.583992  | -0.930000 |
| H  | -6.759979 | 1.072256  | 0.082859  |

|   |           |           |           |
|---|-----------|-----------|-----------|
| H | -8.460221 | -3.123807 | 1.326618  |
| H | -9.794982 | -2.013679 | 0.698813  |
| H | -8.192272 | -0.554100 | -0.339021 |
| H | -6.267321 | -4.590184 | 1.261952  |
| H | -5.494972 | -4.905602 | -0.294095 |
| H | -7.149604 | -4.283347 | -0.235708 |
| H | -3.412884 | -4.368791 | 0.223094  |
| H | -1.297991 | 4.402140  | -0.088070 |
| H | 1.388336  | 4.584413  | 0.896576  |
| H | 1.165416  | 4.742124  | -0.847110 |
| H | 2.641873  | 3.995640  | -0.206482 |
| H | -0.037187 | -5.765644 | -1.216827 |
| H | -1.779104 | -5.475504 | -1.362605 |
| H | -0.631608 | -4.344669 | -2.099043 |
| H | -0.945046 | -4.850992 | 0.918337  |
| H | 1.304862  | -3.730220 | -0.462769 |
| H | 1.412503  | -4.613204 | 1.863504  |
| H | 0.438342  | -3.250750 | 2.445544  |
| H | 2.063899  | -2.964995 | 1.804581  |
| H | 3.751338  | -4.580337 | -1.692526 |
| H | 4.756125  | -3.973324 | -0.333447 |
| H | 4.954643  | -3.279373 | -1.963206 |
| N | 7.055688  | 0.428847  | -1.144811 |
| C | 7.909839  | 0.440925  | -1.927616 |
| C | 8.983513  | 0.456220  | -2.912018 |
| H | 9.806959  | -0.186030 | -2.582521 |
| H | 8.615685  | 0.092680  | -3.877232 |
| H | 9.361286  | 1.476023  | -3.040548 |
| N | 6.340407  | 0.869630  | 1.859379  |
| C | 6.737180  | 1.223169  | 2.889083  |
| C | 7.243487  | 1.672176  | 4.179249  |
| H | 7.828601  | 0.876539  | 4.651441  |
| H | 7.883172  | 2.550732  | 4.047318  |
| H | 6.411060  | 1.937328  | 4.838739  |

2. Simulation of the UV-visible spectra using the Chla model used. The computed transitions are superimposed.

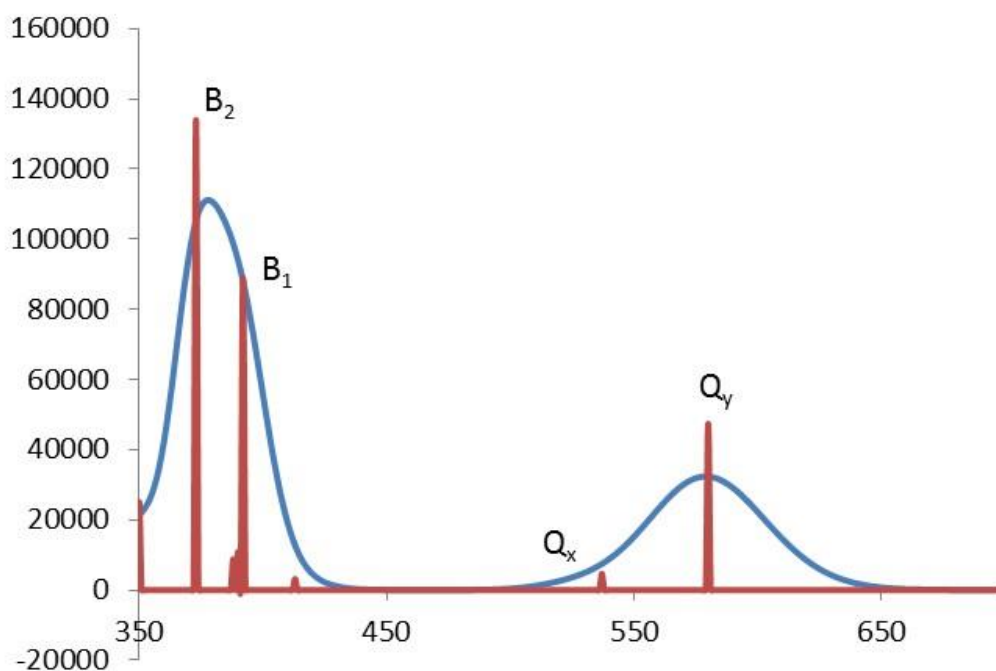

3.  $Q_y$ -state of Chla, S(Cu) and S(Zn) using different levels (single point TD-DFT calculations carried out on geometry optimized at the corresponding DFT level).

|                                                        | <i>B3LYP/6-31G*</i> | <i>CAM-B3LYP/6-31G*</i> | <i>BP86/6-31+G**</i> |
|--------------------------------------------------------|---------------------|-------------------------|----------------------|
| <i>Chla (Pheo(Mg))</i>                                 |                     |                         |                      |
| <i><math>\gamma</math> (nm) <math>Q_y</math>-state</i> | 579.64              | 590.67                  | 616.52               |
| <i>f (Intensity)</i>                                   | 0.2369              | 0.2441                  | 0.2046               |
| <i>S(Cu) (Pheo(Cu))</i>                                |                     |                         |                      |
| <i><math>\gamma</math> (nm) <math>Q_y</math>-state</i> | 572.35              | 579.64                  | 608.55               |
| <i>f (Intensity)</i>                                   | 0.2471              | 0.2511                  | 0.1959               |
| <i>S(Zn)(Pheo(Zn))</i>                                 |                     |                         |                      |
| <i><math>\gamma</math> (nm) <math>Q_y</math>-state</i> | 571.92              | 580.91                  | 609.97               |
| <i>f (Intensity)</i>                                   | 0.2386              | 0.2460                  | 0.2058               |

4. Superposition of the simulated UV-visible spectra of the Cu substituted (green), Cu-chelated (red) and Cu-deprotonated (blue).

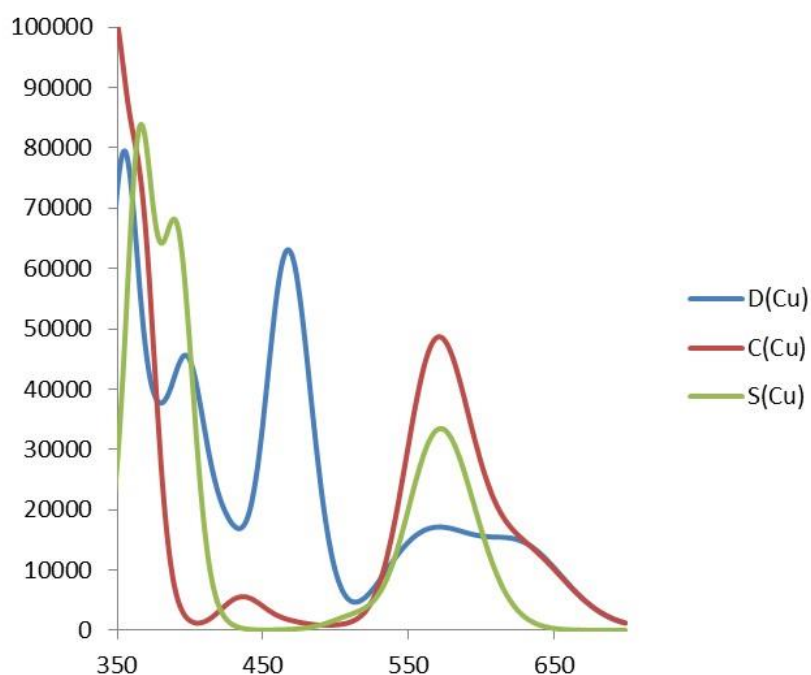

5. Gibbs free energies for processes 2a, 2b and 2c, computed without PCM or when using single point calculation within the standard PCM model implemented in Gaussian09.<sup>28b</sup> Values in parenthesis refer to the standard implementation in Gaussian 03.<sup>29</sup>

|    | Cu          |               | Zn          |               |
|----|-------------|---------------|-------------|---------------|
|    | Without PCM | With PCM      | Without PCM | With PCM      |
| 2a | -44.1       | -55.1 (-35.2) | -19.2       | -25.6 (-17.3) |
| 2b | -27.7       | -11.0         | -22.5       | 1.8           |
| 2c | -15.6       | 7.9           | +1.5        | 24.7          |
